# Supplementary material
Source: PubMed Central journal article supplement (PMC5605939)
Supplement: mbo004173485s2.pdf [file mbo004173485s2.pdf]

# Supplementary text 2:

## Examples of intergenic hits into unannotated ORFs

### Spacer 1:

>JOE01000009.1\_62635\_14\_spacer\_63457\_32

GACCAGGCGTCCCCGCTGACGCTGATCGCGGT

Hit coordinates:

ContigID: LGDA01000250

Start: 45153

Stop: 45184

Intergenic sequence:

>gi|925387131|gb|LGDA01000250.1|:44655-45964 Streptomyces sp. WM6368 P399contig36.1, whole genome shotgun sequence

TAAGACATGCGGTGTGGCCGGGCACATGGATGCCCGGCATCCGACAGGGTCCTGCGAGCTGCCGCGTG  
AGCACAGTGCAGCAGGACAGGCGGAGTCTGGCGGGGAACGGGAGTCGGCTGCGGCATACCCCGGAGGACG  
ACTAAGTACAGCTGGATGGTTGCCGGCCACGCCGTCGGTGGACCATCCGACGGGCGGTCTCTGCTGCTGC  
GGCGGCGTGGCCAGGAGCAGGTGCGGGTCTCCAGCCGGAACGGCGCGTACCGCCCCGGCTCCGGCT  
CGTACCGGCGATACGGGGCGCTCTCGTAGACGACGGTGGTGTTCGGGCAGTCTCCGCGACCCCGAGCAG  
CGCTTGGCGCTCGGCGTCTCGGCGGCAAGGCTCCAGCGCAACTTCGCCGCGGTCCACTGGGCGGCGTAC  
TCGCAGTGGTAACCGCTGGCCGGCGGAATCCACTGCGCCGGATCCTTGTGCGCCTTCGACCGGTTGACT  
TCGCGGTACCCGCGATCAGCGTCAGCGGGGACGCCTGGTTCGTCGTACGCCTCACGCCGGACCGCGTC  
CCACGCGAAGCTGCCCGAGTCGTGGACTTCGGCCAAAGGTACGAAATGGTCTACATCAAGGCCCGCGGGC  
TCCGTCAACAACGACGTCGCCGTAAGGGCTCAGCCGCGATCCACCCGACATCTTGACGCCCGCAGCGACGA  
CCGGGGCCTCGACGGCCTCGGACAGGATGACTTCCCTGCGGGTATCACAGCCGTGGTTCGCGTTCAGCCC  
GCGGTTCCAGTGCTTGTACAGGTCCCACTTGTAAACCTCCCGCTGCTCATCAGCGACGGGGATCCGGTTCG  
ATGGCCTCGAACAGCGGCAGCGGCGCACGGACTCCGGGAGCCCCAGCGATACCGGACGAGGCGGGGACGC  
CCGCTGGGTGCCGGCCGCGTGCGCCGGGTCGGTGGCGAGCAGGGGCAGGGCAGCGAGAGCGAGCGC  
GGGAGGACCACGCTGCAGCAGGTTCTTGATCACGCAGTGGGTTGTAGCGGTGCCCCAGCGGGACAGGGCC  
TGGGGCCTCAGCTACCCGACAGGCCGCGGAATCACCGCAGAAACGATCAGCGGCTGGGCCGACCGGC  
AGCCGGTCAACGCTCTCAGCGCGAGATCATCTTTGGCCCGTGGGCAACGGCTCGGTCCCGGGCAACCC  
ACACGCATCATCGGGAGTACCAGCAGATTCCAGCGCACGGCAGTTGCAACATCATGGCGTCAGGTGCCT  
CGAGTCAGCTGCACATGACGGTCTTTGCGACGTCTCCAGACGAGGGCCG

Top 10 BLASTX hits: into HNH endonuclease

# Fields: query id, subject id, subject ids, subject length, s. start, s. end, evalue, query seq, subject seq, q. start, q. end, score, subject sci names, subject title

# 10 hits found



## Spacer 2:

>JQ0001000126.1\_6927\_10067\_28\_spacer\_9569\_35  
AGTCTATTTTGCCTGCTAACGGTTTCAGCATCTC

Hit coordinates:

ContigID: AOUX01000192

Start: 3802

Stop: 3836

Intergenic sequence:

>gi|456831403|gb|AOUX01000192.1|:3205-4402 *Leptospira interrogans* serovar Naam str. Naam ctg718000007680, whole genome shotgun sequence

```
TTAGCTCCGATCTGTCCAACCTTTTTAGGGCGTTTTTTTTAATAGTTTTTTTGGTCTGAATTACGTTGGT
CGCGCGATCAGGATAATATTTTCAACCAAATCAACCGTATACGGTGGTAAGACTTTTGACTTCTCGTCC
GTAATTTCAATTTCTTGCGAATCGATCCTTTAATGGTAGCAAAAGGCAATTCAACAGTTTTTTTATTTA
CAAATATTAATTTTTATTATTCAGAATATATTTACGTATTTGTTGTCCAAGCTTTCTTTCAAAAAC
TAATCTCGTTCAGTATTTGTAATTTAGAACGAACAGTTTCAACTCCGCGTTTTTTGTCCCCGTCGATG
CGTTTTAGATCGGATTCGATCTCGATTAATCTTTGAAGTCGTTATTAAGATCCTCTAATGTTTTAGGCG
GTCGGGTTGAACCTCATCGACAGTCTCCTTATTGATTTTTAATCTACTTGCCTCGTTGTCGACTAATA
GTAATTTACGTTTCCCTTTTGGGACCTTTGTTCCCTTTTTTTCGATCGCCTCAATAACAAGGAGCGATTT
AGGTCCTGGGATTAATCTGATTGTTTTATTGTAATCGGAGATGCTGAAACCGTTAGCAGTGCAAAATAGA
CTCATACGGCTATATAATTTGCCTATATGCGCCTTCAAGTTCTTCTCGGTGGCCTCCGAAAGTAATCTTT
CTGACTTTTGGGTTTGTGTTGCTCATTGTACATCTATAAATTATAATTACTACTATGGTTAGGCATAAT
AAACGTATTATAAAAAGCTCAAGCATCTAGATCCCAGAAAATATAAAACACAGTTACCCAAATAGCAGCA
GCTAAAAAGATCAAGAATGCTTGTAAAAAGAGATACGCTGTCATAACTTTACAACCCCAAGTGGATT
AACGGAACCCCTGTGATGATGAAGGGCTATAGCGATCAATGAGGCGACGCACTTAAGGCTTGTTTTTTT
GCGTCGGACCGATCCATGTGGAGCTCGTCACCATCACCATCTTTCTGAAAAAATAGATCTGAATGCTCTA
TAGTTTGTAAAGCACGTCTGAAAAGATCATATATCGGCCTCCACCAAACCTGTTTATTGTTCCAAATC
TTAACTGCGTCCGCAATTGATTGCGCAATATTGTGGTTACGCGACAAGAGTGACATCTAACGGCATAGG
CCTTGTTTC
```

Top 10 BLASTX hits: into hypothetical protein

```
# Fields: query id, subject id, subject ids, subject length, s. start, s. end, evalue, query seq, subject seq, q. start, q. end, score, subject sci names, subject title
# 10 hits found
gi|456831403|gb|AOUX01000192.1|:3205-4402 gi|446021850|ref|WP_000099705.1| gi|446021850|ref|WP_000099705.1| 176 1 145 8.09e-94
MSSTRPPKTLLEDLNKRLQRLIEIESDLKRIDGDKNAEVEVRSKFTNTERELVFERESLDKQIRKYILNKNLIFVNKKTVELPFATIKRIDSQEIEITDEKSKVLPPYTVDLVEKYYPDRATNVIQTKKTIKKNALKSWTDAEL
MSSTRPPKTLLEDLNKRLQRLIEIESDLKRIDGDKNAEVEVRSKFTNTERELVFERESLDKQIRKYILNKNLIFVNKKTVELPFATIKRIDSQEIEITDEKSKVLPPYTVDLVEKYYPDRATNVIQTKKTIKKNALKSWTDAEL 436
2 735 Leptospira interrogans hypothetical protein [Leptospira interrogans]
gi|456831403|gb|AOUX01000192.1|:3205-4402 gi|488052634|ref|WP_002124031.1| gi|488052634|ref|WP_002124031.1| 176 1 145 3.59e-93
MSSTRPPKTLLEDLNKRLQRLIEIESDLKRIDGDKNAEVEVRSKFTNTERELVFERESLDKQIRKYILNKNLIFVNKKTVELPFATIKRIDSQEIEITDEKSKVLPPYTVDLVEKYYPDRATNVIQTKKTIKKNALKSWTDAEL
```

MSSTRPPKLTLEDLNKQLRLIEIESDLKRIDGDKNAEVEVTRSKFTNTERELVFERESLDKQIRKYILNKNLIFVNKKTVELPFATIKRIDSQEIEITDEKSKVLPPYTVDLVEKYYPDRATNVIQTKKTIKKNALKSWTDAEL 436  
2 730 Leptospira interrogans Gam-like protein [Leptospira interrogans]  
gi|456831403|gb|AOUX01000192.1|:3205-4402 gi|516461609|ref|WP\_017850447.1| gi|516461609|ref|WP\_017850447.1| 176 1 145 8.23e-87  
MSSTRPPKLTLEDLNKRLQRLIEIESDLKRIDGDKNAEVEVTRSKFTNTERELVFERESLDKQIRKYILNKNLIFVNKKTVELPFATIKRIDSQEIEITDEKSKVLPPYTVDLVEKYYPDRATNVIQTKKTIKKNALKSWTDAEL  
MSLTQPPKLTLEDLNKRLQRLIKIDSDLKRIDGDKNAEVEVTRSKFTDTERDLVFERESLDKQVREYILNKNLIFVNKKTVELPFATIKRIDSQEIEITDEKSKVLPPYTVDLVEKYYPDRATNVIQTKKTIKKTALKSWTGAEL 436  
2 688 Leptospira interrogans hypothetical protein [Leptospira interrogans]  
gi|456831403|gb|AOUX01000192.1|:3205-4402 gi|490915838|ref|WP\_004777741.1| gi|490915838|ref|WP\_004777741.1| 176 1 145 1.75e-79  
MSSTRPPKLTLEDLNKRLQRLIEIESDLKRIDGDKNAEVEVTRSKFTNTERELVFERESLDKQIRKYILNKNLIFVNKKTVELPFATIKRIDSQEIEITDEKSKVLPPYTVDLVEKYYPDRATNVIQTKKTIKKNALKSWTDAEL  
MSSTQPPKLTLEDLNKRLQRLIEIESDLKRIDGDKNTEVESVRSRFDTERELVFEKENLDKQVREYILNKNLIFVNKKTVELPFATIKRIDSQEIEITDEKSKTLPPTYVDLVEKYYSRPNVVIQTKKTIKKAALKNWTNAEL 436  
2 640 Leptospira kirschneri Gam-like protein [Leptospira kirschneri]  
gi|456831403|gb|AOUX01000192.1|:3205-4402 gi|487897388|ref|WP\_001970854.1| gi|487897388|ref|WP\_001970854.1| 178 1 147 1.00e-69  
LSMSSTRPPKLTLEDLNKRLQRLIEIESDLKRIDGDKNAEVEVTRSKFTNTERELVFERESLDKQIRKYILNKNLIFVNKKTVELPFATIKRIDSQEIEITDEKSKVLPPYTVDLVEKYYPDRATNVIQTKKTIKKNALKSWTDAEL  
MSTTQNPQPKLTLEDLNKMQRLVEIESDLKRIEAGEKNSEVESVRSRFDTERDLVFEKEELDKQVRDFVQNKDTLFAHRKTVELPFATIKRIDSQEIEITDEKSKELPPYSVDLIEKFYPERANNAIQIKKTVKKTALKSWTDAEL 442  
2 575 Leptospira interrogans Gam-like protein [Leptospira interrogans]  
gi|456831403|gb|AOUX01000192.1|:3205-4402 gi|1001638526|ref|WP\_061216057.1| gi|1001638526|ref|WP\_061216057.1| 176 1 145 4.86e-69  
MSSTRPPKLTLEDLNKRLQRLIEIESDLKRIDGDKNAEVEVTRSKFTNTERELVFERESLDKQIRKYILNKNLIFVNKKTVELPFATIKRIDSQEIEITDEKSKVLPPYTVDLVEKYYPDRATNVIQTKKTIKKNALKSWTDAEL  
MNAAQTPKLTLEDLNARLQRLVEIEANLKRIGGDKNTEVESVRSRFDTERDLVFEKEQLDRQVREFVLQNKDTLFVHRKTIELPFATIKRIDSQEIEITDEKSKTLPYSVDLIEKFYPERASDAIQIKKSIKKAALKSWTDAEL 436  
2 571 Leptospira santarosai Gam-like protein [Leptospira santarosai]  
gi|456831403|gb|AOUX01000192.1|:3205-4402 gi|490641537|ref|WP\_004506532.1| gi|490641537|ref|WP\_004506532.1| 178 1 147 1.55e-67  
LSMSSTRPPKLTLEDLNKRLQRLIEIESDLKRIDGDKNAEVEVTRSKFTNTERELVFERESLDKQIRKYILNKNLIFVNKKTVELPFATIKRIDSQEIEITDEKSKVLPPYTVDLVEKYYPDRATNVIQTKKTIKKNALKSWTDAEL  
MNRAPNPQPKLTLEDLNKMQRLIEIKSDLKRIEAGEKNTEVESIRSRFVGVGERDLVFEKEELDKQVREFVQNKDTLFVHRKTIELPFATIKRIDSQEIEITDEKSKTLPYSVDLIEKFYPERANNAIQIKKSVKKTALKSWTDAEL 442  
2 561 Leptospira weilii Gam-like protein [Leptospira weilii]  
gi|456831403|gb|AOUX01000192.1|:3205-4402 gi|515129273|ref|WP\_016758123.1| gi|515129273|ref|WP\_016758123.1| 177 8 146 1.70e-65  
PKTLEDLNKRLQRLIEIESDLKRIDGDKNAEVEVTRSKFTNTERELVFERESLDKQIRKYILNKNLIFVNKKTVELPFATIKRIDSQEIEITDEKSKVLPPYTVDLVEKYYPDRATNVIQTKKTIKKNALKSWTDAEL  
PKSLEDLNIRMQRLEIESDLKRIEAGEKNTEVEDTRSHFVEVERDLVFEKERLDKQIRAFVNMENKNTLFVHRKTIELPFATIKRIDSQEIEITDEKSKTLPYSVDLIEKFYPERANNAIQIKKSVKKTALKSWTDAEL 418 2  
547 Leptospira MULTISPECIES: hypothetical protein [Leptospira]  
gi|456831403|gb|AOUX01000192.1|:3205-4402 gi|516465861|ref|WP\_017854324.1| gi|516465861|ref|WP\_017854324.1| 103 1 103 6.90e-64  
MSKQTQKSERLLSEATEKKLKAHIGKLYSRMSLFCANGFSISDYNKTIIRLIPGPKSLLVIEAIEKKGTKVPGKRRKLLLDNERASRLKINKETVDEFNPTA  
MSKQTQKSERLLSEATEKKLKAHIGKLYSRMSLFCANGFSISDYNKTIIRLIPGPKSLLVIEAIEKKGTKVPGKRRKLLLDNERASRLKINKETVDEFNPTA 725 417 529 Leptospira  
interrogans hypothetical protein [Leptospira interrogans]  
gi|456831403|gb|AOUX01000192.1|:3205-4402 gi|516474782|ref|WP\_017863226.1| gi|516474782|ref|WP\_017863226.1| 176 1 145 1.48e-61  
MSSTRPPKLTLEDLNKRLQRLIEIESDLKRIDGDKNAEVEVTRSKFTNTERELVFERESLDKQIRKYILNKNLIFVNKKTVELPFATIKRIDSQEIEITDEKSKVLPPYTVDLVEKYYPDRATNVIQTKKTIKKNALKSWTDAEL  
MNAAQTPKLTLEDLNALHQLRLVEIEANLKRIDGDKNTEVESVRSRFDTERDLVFEKEQLDRQVREFVLQNKDTLFVHRKTIELPFATIKRIDSQEIEITDEKSKTLPYSVDLIEKFYPERVSDAIQIKKLIKTTLKSWTDAEL 436  
2 521 Leptospira santarosai hypothetical protein [Leptospira santarosai]

### Spacer 3:

>HG916826.1\_842637\_846204\_26\_spacer\_844192\_32  
TACATCAGCAAGGACGGCCCGGACATGATCCC

Hit coordinates:

ContigID: LMMB01000004

Start: 84179

Stop: 84210

Intergenic sequence:

>gi|944790866|gb|LMMB01000004.1|:84017-84790 Pseudomonas sp. Leaf83 contig\_12, whole genome shotgun sequence  
TGTACAAGCCAGTATTTCCGGGGTTC TAGCCGGATCGCTTCTCAGATGGGAGCGTTTTGGGAACACTTT  
GGGAATGGTGGAACGAAAAAGGCAGCCTGCGAGGGCTGCCTTTTGTCTGTTTCTAGGGCCTGGATTCACAG  
CTTTAGCGCGTCTCCAGGAGCGGGATCATGTCCGGGCCGCTCTTGCTGATGTACTTGCCGTAATGACGT  
TCGAGCATTGCGATTGTCTGTGCTTCCATACGGCTGACGCAGGCTGGGCAGAGGCAC TTGTAACCGCCG  
CTGTTGGTGGTCATGGCTGGGGCTTCTGTGCAGGGCAGGATGGCGCCCACTTCGGCGTGGCGCGCGGC  
GATGTGCTGGCGGTGGGCGGTGATGATGCTGGCCAGCTCGGCTTCGTCGATTTGCCCGTCTTCCAGGGCC  
TTGAGGATCATCGCTCGACCTTGCCCGCTTTACCGCCGTGCCCATGGCGCGGGCCAGCAGGTCAATGT  
TGTCCTGTCTGTGTCAGCTCGGGCAGGGGACGTAACCGCCGTTGTAGAGGCTGGTGAGGTAGTCGGGCAGA  
TAGCTGGTGCCGGCGACCTTCTCCAGCTGGCGCAC TTGTTCTCGTCCAGCGGGCGGTTGCCGGGGTTCT  
CGTACAGCTTGTGTCGAAGTCTGTTGAGGTCCAGCCCCGGGCAGGTGGCGGCGCATTCGCGGCCCCCTGG  
GAAGGCGCCCCGGTGAGGGGGAATGCGAGGGCGATATCGGCAAGGCCGTGCTGGTGGGCGATCCGTTGTG  
AATC

### Top 10 BLASTX hits: into hypothetical protein

# Fields: query id, subject id, subject ids, subject length, s. start, s. end, evalue, query seq, subject seq, q. start, q. end, score, subject sci names, subject title  
# 20 hits found

| Query ID                                    | Subject ID                      | Subject IDs                     | Subject Length | s. start | s. end | evalue   | Query Seq                                                                  | Subject Seq                                                                  | q. start | q. end | score | Subject Sci Names         | Subject Title                                    |
|---------------------------------------------|---------------------------------|---------------------------------|----------------|----------|--------|----------|----------------------------------------------------------------------------|------------------------------------------------------------------------------|----------|--------|-------|---------------------------|--------------------------------------------------|
| gi 944790866 gb LMMB01000004.1 :84017-84790 | gi 980973412 ref WP_059392489.1 | gi 980973412 ref WP_059392489.1 | 156            | 83       | 156    | 1.47e-63 | LPELTDNIDLLARAMGTAVKRGKVDAMILKALEDGQIDEAELASII TAHRQHIAARHAEV GAILALHRKPQP | MPEPADTDNIDLLARAMGTAVKRGKVDAMILKALEDGQIDEAELASII TAHRQHIAARHAEV GAILALHRKPQP | 515      | 294    | 355   | Pseudomonas toyotomiensis | hypothetical protein [Pseudomonas toyotomiensis] |
| gi 944790866 gb LMMB01000004.1 :84017-84790 | gi 980973412 ref WP_059392489.1 | gi 980973412 ref WP_059392489.1 | 156            | 18       | 85     | 1.47e-63 | GAFPGGRECAATCPGLDLKQFDNKL YENPGNRPLTDEQVRQLEKVAGTSYLPDYLTSLYNGVYVPCPS      | AAFPGGRECAATCLGLDLKQFDNKL YENPGHRPLTDEQVRQLEKVAGTSYLPDYITGLYNGVVFAMPE        | 709      | 506    | 327   | Pseudomonas toyotomiensis | hypothetical protein [Pseudomonas toyotomiensis] |
| gi 944790866 gb LMMB01000004.1 :84017-84790 | gi 545127478 ref WP_021488921.1 | gi 545127478 ref WP_021488921.1 | 155            | 82       | 155    | 2.10e-63 | LPELTDNIDLLARAMGTAVKRGKVDAMILKALEDGQIDEAELASII TAHRQHIAARHAEV GAILALHRKPQP | MPELTDNIDLLARAMGTAVKRGKVDAMILRALEDGQIDEAELASII TAHRQHIAARHAEV GAILALHRKPQP   | 515      | 294    | 367   | Pseudomonas mendocina     | hypothetical protein [Pseudomonas mendocina]     |
| gi 944790866 gb LMMB01000004.1 :84017-84790 | gi 545127478 ref WP_021488921.1 | gi 545127478 ref WP_021488921.1 | 155            | 18       | 84     | 2.10e-63 | GAFPGGRECAATCPGLDLKQFDNKL YENPGNRPLTDEQVRQLEKVAGTSYLPDYLTSLYNGVYVPCPS      | AAFPGGRECAA-CLGLDLKQFDNKL YENPGHRPLTDEQVRQLEKVAGT TYLPDYLTDLYNGVVFAMPE       | 709      | 506    | 313   | Pseudomonas mendocina     | hypothetical protein [Pseudomonas mendocina]     |
| gi 944790866 gb LMMB01000004.1 :84017-84790 | gi 917193888 ref WP_051800600.1 | gi 917193888 ref WP_051800600.1 | 156            | 83       | 156    | 2.14e-62 | LPELTDNIDLLARAMGTAVKRGKVDAMILKALEDGQIDEAELASII TAHRQHIAARHAEV GAILALHRKPQP | MPEPADTDNIDLLARAMGTAVKRGKVDAMILKALEDGQIDEAELASII TAHRQHIAARHAEV GAILALHRKPQP | 515      | 294    | 355   | Pseudomonas oleovorans    | hypothetical protein [Pseudomonas oleovorans]    |
| gi 944790866 gb LMMB01000004.1 :84017-84790 | gi 917193888 ref WP_051800600.1 | gi 917193888 ref WP_051800600.1 | 156            | 18       | 85     | 2.14e-62 | GAFPGGRECAATCPGLDLKQFDNKL YENPGNRPLTDEQVRQLEKVAGTSYLPDYLTSLYNGVYVPCPS      | AAFPGGRECAAACLGLDLKQFDNKL YENPGHRPLTDEQVRQLEKVAGTSYLPDYITGLYNGVVFAMPE        | 709      | 506    | 317   | Pseudomonas oleovorans    | hypothetical protein [Pseudomonas oleovorans]    |

|                                                                            |                                                                              |                                 |     |     |     |                       |
|----------------------------------------------------------------------------|------------------------------------------------------------------------------|---------------------------------|-----|-----|-----|-----------------------|
| gi 944790866 gb LMMB01000004.1 :84017-84790                                | gi 835622920 ref WP_047589232.1                                              | gi 835622920 ref WP_047589232.1 | 156 | 83  | 156 | 8.82e-60              |
| LPELTDNIDLLARAMGTAVKRGKVDAMILKALEDGQIDEAELASIIIAHRQHIAARHAEVGAIALHRKPQP    | MPELADTDNIDLLARAMGTTIKRGTVDAEILKALEDGEISEAELASIIAAHRQHIAARHAEVGAIALHRKPQP    |                                 |     |     |     | 515                   |
| 294 331 Pseudomonas mendocina                                              | hypothetical protein [Pseudomonas mendocina]                                 |                                 |     |     |     |                       |
| gi 944790866 gb LMMB01000004.1 :84017-84790                                | gi 835622920 ref WP_047589232.1                                              | gi 835622920 ref WP_047589232.1 | 156 | 18  | 84  | 8.82e-60              |
| GAFPGGRECAATCPGLDLKQFDNKLLENPGRPLTDEQVRQLEKQVAGTSYLPDYLTSLYNGVYVPCP        | AAFPGGRECAATCLGLDLKQFDNKLLENPGRPLTDEQVLQLEKQVAGTSYLPDYISGLYNGVYVAMP          |                                 |     |     |     | 709                   |
| 509 318 Pseudomonas mendocina                                              | hypothetical protein [Pseudomonas mendocina]                                 |                                 |     |     |     |                       |
| gi 944790866 gb LMMB01000004.1 :84017-84790                                | gi 503480628 ref WP_013715289.1                                              | gi 503480628 ref WP_013715289.1 | 159 | 18  | 84  | 3.53e-53              |
| GAFPGGRECAATCPGLDLKQFDNKLLENPGRPLTDEQVRQLEKQVAGTSYLPDYLTSLYNGVYVPCP        | AAFPGGRECAATWGLDLKQFDNKLLENPGRPLTDEQVLQLEKQVAGTSYLPDYISGLYNGVYVAMP           |                                 |     |     |     | 709                   |
| 509 313 Pseudomonas mendocina                                              | hypothetical protein [Pseudomonas mendocina]                                 |                                 |     |     |     |                       |
| gi 944790866 gb LMMB01000004.1 :84017-84790                                | gi 503480628 ref WP_013715289.1                                              | gi 503480628 ref WP_013715289.1 | 159 | 83  | 159 | 3.53e-53              |
| LPELTDNIDLLARAMGTAVKRGKVDAMILKALEDGQIDEAELASIIIAHRQHIAARHAEVGAIALHRKPQP*PP | MPELAELDNIDLLERAMTTTIKRGTVDAMILTALKDGEINEAELASIIAHRQHMAARHAEVSSILALHSKRQEPKP |                                 | 515 | 285 | 279 | Pseudomonas mendocina |
| protein [Pseudomonas mendocina]                                            |                                                                              |                                 |     |     |     | hypothetical          |

## Spacer 4:

>LFQC01000004.1\_87106\_87459\_1\_spacer\_87136\_35  
GTAACAGATGATATTAATTCAAAGAATTAACCT

Hit coordinates:

ContigID: AOSX01000029

Start: 620311

Stop: 620345

Intergenic sequence:

>gi|727535586|gb|AOSX01000029.2|:619946-620968 Clostridium botulinum Af84 Contig\_29, whole genome shotgun sequence

```
AAATTCGGATAGAAACATAGATATTTCTCATATAGATTTTTTTGATTAATTATATGCACTGATGCTATGA
ATAAAAACAAAAAATTCTAAAAGTTTTCCAACCGCATTAAATTTTAAAACCTATCCTAAGCATTGCAA
TATAAGGCTTAAGATAGGTTTTGTTTATGTTTTCTGAAAAATCACAAATGGCTGGAAAAATTTTTTTAA
TCATTGTAAAATCAAATGCATATGCTATTCCTTAAAATTAAGGAATGGCTAATTTACTATGGATGAACAT
TAACATAGGATGATTTAAATTTGGAAAAGCTTACTAGATTTCTTACCTATATCGGGTTGAACAATAACAT
GAGATGCATTTAAATAAGTTAATTCCTTTGAATTTAATATCATCTGTTACACTGAACAATAACATAAGAT
GTATTATTA AAAATGGTAGTTGTAGCTTATGTTATAGCTATTATTTTTCAATATTTAGAGGAATTTTTT
ACATATGTAGAATATTTGTATATAGTCCCTTTAATTCATTATCAAATCTTCTTGAATAAAAAGGAGCCT
GTGTATGCAGTGGGGGCTCCTTTTTTATATTATTTGAAGGAATTTTTAACATTTATAGAATATTAATA
TAACGGCTTCCCAATAGGTTGATTATAGACCTCTTGCTTAAGCAAAAAGAACCCCAATAAAAAGGGGTT
CTTTTTGTATGGATTTATATTGGTGCTATGTATTGGTCTATTTTTACTATATCCAGATGTAGAAAAGT
TAATCAGTAAGAAATATATAAGATGTAAATTTTTAAATGTATTTCTATAATGAGAGTACCTTATTTTTTA
TTTTTTTGATAAAAATTTAAGAAAATTAGCAATTTATTAATAAAAATTTAAAATAATTATTTAATTTCA
TTTTAAAGTTGTATCAGAATGTATAAAAAGTAAAAGATGTAGGATAAACAAAGAAGGAATTGAATTA
TTGTAAGAATATAAATATTATGGTAAAAATATAAAATAAATA
```

Top 10 BLASTX hits: (1 hit found) into hypothetical protein

# Fields: query id, subject id, subject ids, subject length, s. start, s. end, evalue, query seq, subject seq, q. start, q. end, score, subject sci names, subject title

# 1 hits found

|                                               |                                                                      |                                  |     |                       |
|-----------------------------------------------|----------------------------------------------------------------------|----------------------------------|-----|-----------------------|
| gi 727535586 gb AOSX01000029.2 :619946-620968 | gi 1119667520 ref WP_072587154.1                                     | gi 1119667520 ref WP_072587154.1 | 80  | 49                    |
| 79                                            | 2.91e-07VTLNNNIRCIKNGSCSLCYSYYFSIFRGIF LKLNNNIRCIKNGSCSLCYSYYFSLFRRI | 396                              | 488 | 136                   |
|                                               | hypothetical protein [Clostridium botulinum]                         |                                  |     | Clostridium botulinum |
