# Supplementary material
Source: PubMed Central journal article supplement (PMC5605939)
Supplement: mbo004173485s3.pdf [file mbo004173485s3.pdf]

# Supplementary text 3:

## Protospacer examples for selected genera

| <u>organism</u>                                 |       | <u>Escherichia coli strain C15</u> |                   |            |                      |           |                                      |                                      |                                                                         |
|-------------------------------------------------|-------|------------------------------------|-------------------|------------|----------------------|-----------|--------------------------------------|--------------------------------------|-------------------------------------------------------------------------|
| Arrays found                                    |       | Start                              | Stop              | Size       | Repeat               | Spacers   | CRISPR Type                          | Organism                             |                                                                         |
| CP011018.1                                      |       | 4417105                            |                   | 4418353    | 1248                 | GTGTTCCCC | 20 Unidentified                      | Escherichia_coli_C15_GCA_000971615.1 |                                                                         |
| CP011018.1                                      |       | 4444052                            |                   | 4445606    | 1554                 | GTGTTCCCC | 25 CAS-I-E                           | Escherichia_coli_C15_GCA_000971615.1 |                                                                         |
| Hits                                            |       | ProtospacerTy                      | ProtospacerContig | Protospace | ProtospaceCRISPR Typ | CRISPR    | Organism                             | ProtospaceTarget                     | ann Note                                                                |
| SpacerID                                        |       |                                    |                   |            |                      |           |                                      |                                      |                                                                         |
| CP011018.1_4444052_4445606_16_spacer_4444996_33 | Phage | LRXJ01000139                       |                   | 68082      | 68114                | CAS-I-E   | Escherichia_coli_C15_GCA_000971615.1 | 562                                  | 562 Escherichia coli strain LV2795 Unknown Prophage region              |
| CP011018.1_4444052_4445606_17_spacer_4445058_32 | Phage | LRXJ01000139                       |                   | 65460      | 65491                | CAS-I-E   | Escherichia_coli_C15_GCA_000971615.1 | 562                                  | 562 Escherichia coli strain LV2795 Unknown Prophage region              |
| CP011018.1_4444052_4445606_19_spacer_4445180_32 | Phage | AFDY01000015                       |                   | 187752     | 187783               | CAS-I-E   | Escherichia_coli_C15_GCA_000971615.1 | 562                                  | 562 Escherichia coli STEC_H.1.8 geUnknown Prophage region               |
| CP011018.1_4444052_4445606_22_spacer_4445363_32 | Phage | AFDY01000015                       |                   | 168382     | 168413               | CAS-I-E   | Escherichia_coli_C15_GCA_000971615.1 | 562                                  | 562 Escherichia coli STEC_H.1.8 gepHage N-6-adenine-met Prophage region |
| CP011018.1_4444052_4445606_3_spacer_4444203_32  | Phage | BBVG01000009                       |                   | 206444     | 206475               | CAS-I-E   | Escherichia_coli_C15_GCA_000971615.1 | 562                                  | 562 Escherichia albertii DNA, cont Unknown                              |
| CP011018.1_4444052_4445606_6_spacer_4444386_32  | Phage | AQG001000031                       |                   | 45042      | 45073                | CAS-I-E   | Escherichia_coli_C15_GCA_000971615.1 | 562                                  | 562 Escherichia coli STEC O174:H2Unknown                                |
| CP011018.1_4444052_4445606_9_spacer_4444569_32  | Phage | KB732762                           |                   | 2420768    | 2420799              | CAS-I-E   | Escherichia_coli_C15_GCA_000971615.1 | 562                                  | 562 Escherichia coli KTE66 genom Unknown Prophage region                |

| <u>Organism</u>                                 |       | <u>Sulfolobus solfataricus P2</u> |                 |            |                      |           |                                                                                                       |                                            |          |              |                                                         |
|-------------------------------------------------|-------|-----------------------------------|-----------------|------------|----------------------|-----------|-------------------------------------------------------------------------------------------------------|--------------------------------------------|----------|--------------|---------------------------------------------------------|
| Arrays found                                    |       | Start                             | Stop            | Size       | Repeat               | Spacers   | CRISPR Type                                                                                           | Organism                                   |          |              |                                                         |
| AE006641.1                                      |       | 1809772                           |                 | 1815557    | 5785                 | CTTTCAATT | 88 CAS-III-B                                                                                          | Sulfolobus_solfataricus_P2_GCA_000007005.1 |          |              |                                                         |
| AE006641.1                                      |       | 1809772                           |                 | 1815557    | 5785                 | CTTTCAATT | 88 CAS-I-A                                                                                            | Sulfolobus_solfataricus_P2_GCA_000007005.1 |          |              |                                                         |
| AE006641.1                                      |       | 1233466                           |                 | 1239959    | 6493                 | GATTAATCC | 102 Unidentified                                                                                      | Sulfolobus_solfataricus_P2_GCA_000007005.1 |          |              |                                                         |
| AE006641.1                                      |       | 1254482                           |                 | 1260452    | 5970                 | CTTTCAATT | 94 CAS-I-A                                                                                            | Sulfolobus_solfataricus_P2_GCA_000007005.1 |          |              |                                                         |
| AE006641.1                                      |       | 1297153                           |                 | 1299148    | 1995                 | CTTTCAATT | 31 CAS-I-A                                                                                            | Sulfolobus_solfataricus_P2_GCA_000007005.1 |          |              |                                                         |
| AE006641.1                                      |       | 1305634                           |                 | 1311637    | 6003                 | GATAATCTC | 95 CAS-I-A                                                                                            | Sulfolobus_solfataricus_P2_GCA_000007005.1 |          |              |                                                         |
| AE006641.1                                      |       | 1744007                           |                 | 1744417    | 410                  | GATAATCTA | 6 Unidentified                                                                                        | Sulfolobus_solfataricus_P2_GCA_000007005.1 |          |              |                                                         |
| SpacerID                                        |       | Protospace                        | ProtospacerCont | Protospace | ProtospaceCRISPR Typ | CRISPR    | Organism                                                                                              | Protospacer                                | Organism | Target       | ann Note                                                |
| AE006641.1_1305634_1311637_24_spacer_1307110_38 | Phage | HG322870.1                        |                 | 1473       | 1510                 | CAS-I-A   | Sulfolobus_solfataricus_P2_GCA_00Sulfolobus monocaudavirus SMV1 complete genome                       |                                            |          | conserved    | archaeal viral membrane protein                         |
| AE006641.1_1305634_1311637_26_spacer_1307235_38 | Phage | HG322870.1                        |                 | 46684      | 46721                | CAS-I-A   | Sulfolobus_solfataricus_P2_GCA_00Sulfolobus monocaudavirus SMV1 complete genome                       |                                            |          | Conserved    | archaeal viral membrane protein, acyltransferase family |
| AE006641.1_1305634_1311637_28_spacer_1307363_39 | Phage | KX607102.1                        |                 | 19586      | 19548                | CAS-I-A   | Sulfolobus_solfataricus_P2_GCA_00Acidianus two-tailed virus variant 1 isolate ATV.v1, complete genome |                                            |          | archaeal     | structural protein                                      |
| AE006641.1_1305634_1311637_29_spacer_1307426_40 | Phage | KX607102.1                        |                 | 50321      | 50360                | CAS-I-A   | Sulfolobus_solfataricus_P2_GCA_00Acidianus two-tailed virus variant 1 isolate ATV.v1, complete genome |                                            |          | MoxR-type    | AAA-ATPase viral structural protein                     |
| AE006641.1_1305634_1311637_32_spacer_1307614_38 | Phage | KX607102.1                        |                 | 4897       | 4860                 | CAS-I-A   | Sulfolobus_solfataricus_P2_GCA_00Acidianus two-tailed virus variant 1 isolate ATV.v1, complete genome |                                            |          | unknown      |                                                         |
| AE006641.1_1305634_1311637_34_spacer_1307738_39 | Phage | HG322870.1                        |                 | 33321      | 33359                | CAS-I-A   | Sulfolobus_solfataricus_P2_GCA_00Sulfolobus monocaudavirus SMV1 complete genome                       |                                            |          | unknown      |                                                         |
| AE006641.1_1305634_1311637_35_spacer_1307801_39 | Phage | HG322870.1                        |                 | 4469       | 4431                 | CAS-I-A   | Sulfolobus_solfataricus_P2_GCA_00Sulfolobus monocaudavirus SMV1 complete genome                       |                                            |          | unknown      |                                                         |
| AE006641.1_1305634_1311637_36_spacer_1307864_37 | Phage | CP001405                          |                 | 10685      | 10721                | CAS-I-A   | Sulfolobus_solfataricus_P2_GCA_00Sulfolobus islandicus Y.N.15.51 plasmid pYN01, complete sequence     |                                            |          | transposase, | IS605 OrfB family                                       |
| AE006641.1_1305634_1311637_37_spacer_1307925_38 | Phage | HG322870.1                        |                 | 36946      | 36909                | CAS-I-A   | Sulfolobus_solfataricus_P2_GCA_00Sulfolobus monocaudavirus SMV1 complete genome                       |                                            |          | intergenic   |                                                         |
| AE006641.1_1305634_1311637_39_spacer_1308050_40 | Phage | HG322870.1                        |                 | 42925      | 42886                | CAS-I-A   | Sulfolobus_solfataricus_P2_GCA_00Sulfolobus monocaudavirus SMV1 complete genome                       |                                            |          | conserved    | archaeal protein                                        |
| AE006641.1_1305634_1311637_40_spacer_1308114_40 | Phage | HG322870.1                        |                 | 9376       | 9337                 | CAS-I-A   | Sulfolobus_solfataricus_P2_GCA_00Sulfolobus monocaudavirus SMV1 complete genome                       |                                            |          | conserved    | archaeal viral protei                                   |
| AE006641.1_1305634_1311637_9_spacer_1306161_39  | Phage | KX607102.1                        |                 | 42367      | 42329                | CAS-I-A   | Sulfolobus_solfataricus_P2_GCA_00Acidianus two-tailed virus variant 1 isolate ATV.v1, complete genome |                                            |          | archaeal     | transmembrane protein                                   |

**Organism**

## Arrays found

ContigId  
 CP003056.1  
 CP003056.1  
 CP003056.1  
 CP003056.1

**Bacillus coagulans 36D1**

| Start   | Stop    | Size | Repeat                         | Spacers | CRISPR Type  |
|---------|---------|------|--------------------------------|---------|--------------|
| 2117433 | 2121795 | 4362 | GTTTGTATTTTACCTATGAGGAATTGAAAC | 65      | CAS-I-B      |
| 2123872 | 2124703 | 831  | GTTTGTATTTTACCTATGAGGAATTGAAAC | 12      | CAS-I-B      |
| 2126172 | 2127007 | 835  | GTTTGTATTTTACCTATGAGGAATTGAAAC | 12      | CAS-I-B      |
| 1096065 | 1097943 | 1878 | GTTTCAATTCCTCATAGTAAATACTAAC   | 28      | Unidentified |

Organism  
 Bacillus\_coagulans\_36D1\_GCA\_000169195.2  
 Bacillus\_coagulans\_36D1\_GCA\_000169195.2  
 Bacillus\_coagulans\_36D1\_GCA\_000169195.2  
 Bacillus\_coagulans\_36D1\_GCA\_000169195.2

## Hits

SpacerID  
 CP003056.1\_1096065\_1097943\_8\_spacer\_1096556\_35  
 CP003056.1\_2117433\_2121795\_14\_spacer\_2118331\_37  
 CP003056.1\_2117433\_2121795\_16\_spacer\_2118466\_39  
 CP003056.1\_2117433\_2121795\_3\_spacer\_2117598\_36  
 CP003056.1\_2117433\_2121795\_36\_spacer\_2119791\_36  
 CP003056.1\_2117433\_2121795\_38\_spacer\_2119925\_35  
 CP003056.1\_2117433\_2121795\_51\_spacer\_2120803\_37  
 CP003056.1\_2126172\_2127007\_1\_spacer\_2126202\_36  
 CP003056.1\_2126172\_2127007\_9\_spacer\_2126738\_37

| Protospacer | ProtospacerCt | ProtospacerEnd |
|-------------|---------------|----------------|
| Phage       | JZDH0100002I  | 1454           |
| Phage       | LBMQ010000I   | 1105           |
| Phage       | DS483513      | 1432           |
| Phage       | LBMQ010000I   | 517            |
| Phage       | JZDH0100002I  | 2448           |
| Phage       | JZDH0100002I  | 33751          |
| Phage       | LBMQ010000I   | 12639          |
| Phage       | LBMQ010000I   | 11525          |
| Phage       | LBMQ010000I   | 44036          |

| CRISPR Typ | CRISPR Organism | Protospacer Orga                       | Target ann                      | Note            |
|------------|-----------------|----------------------------------------|---------------------------------|-----------------|
| 1488       | Unidentifie     | Bacillus_coagulans_36D1_GCA_000169195. | Bacillus coagulans Type II seci | prophage region |
| 1141       | CAS-I-B         | Bacillus_coagulans_36D1_GCA_000169195. | Bacillus coagulans unknown      | prophage region |
| 1470       | CAS-I-B         | Bacillus_coagulans_36D1_GCA_000169195. | Parvimonas micra unknown        | prophage region |
| 552        | CAS-I-B         | Bacillus_coagulans_36D1_GCA_000169195. | Bacillus coagulans unknown      | prophage region |
| 2483       | CAS-I-B         | Bacillus_coagulans_36D1_GCA_000169195. | Bacillus coagulans unknown      | prophage region |
| 33785      | CAS-I-B         | Bacillus_coagulans_36D1_GCA_000169195. | Bacillus coagulans unknown      | prophage region |
| 12675      | CAS-I-B         | Bacillus_coagulans_36D1_GCA_000169195. | Bacillus coagulans unknown      | prophage region |
| 11560      | CAS-I-B         | Bacillus_coagulans_36D1_GCA_000169195. | Bacillus coagulans unknown      | prophage region |
| 44072      | CAS-I-B         | Bacillus_coagulans_36D1_GCA_000169195. | Bacillus coagulans unknown      | prophage region |

**Organism**

## Arrays found

ContigId  
 AP014696.1  
 AP014696.1  
 AP014696.1  
 AP014696.1  
 AP014696.1

**Clostridium botulinum strain 111**

| Start   | Stop    | Size | Repeat    | Spacers | CRISPR Type  |
|---------|---------|------|-----------|---------|--------------|
| 2305105 | 2306712 | 1607 | ATTTAAATA | 17      | CAS-I-B      |
| 2316191 | 2316671 | 480  | ATTTAAATA | 7       | CAS-I-B      |
| 2327560 | 2331536 | 3976 | ATTTAAATA | 33      | CAS-III-B    |
| 2337096 | 2337798 | 702  | ATTTAAATA | 10      | Unidentified |
| 2350475 | 2351031 | 556  | ATTTAAATA | 8       | Unidentified |

Organism  
 Clostridium\_botulinum\_111\_GCA\_000829015.1  
 Clostridium\_botulinum\_111\_GCA\_000829015.1  
 Clostridium\_botulinum\_111\_GCA\_000829015.1  
 Clostridium\_botulinum\_111\_GCA\_000829015.1  
 Clostridium\_botulinum\_111\_GCA\_000829015.1

## Hits

SpacerID  
 AP014696.1\_2305105\_2306712\_13\_spacer\_2306381\_37  
 AP014696.1\_2305105\_2306712\_15\_spacer\_2306514\_36  
 AP014696.1\_2305105\_2306712\_4\_spacer\_2305572\_34  
 AP014696.1\_2305105\_2306712\_5\_spacer\_2305636\_36  
 AP014696.1\_2316191\_2316671\_2\_spacer\_2316278\_36  
 AP014696.1\_2316191\_2316671\_3\_spacer\_2316344\_35  
 AP014696.1\_2316191\_2316671\_4\_spacer\_2316409\_34  
 AP014696.1\_2327560\_2331536\_10\_spacer\_2329090\_34  
 AP014696.1\_2327560\_2331536\_26\_spacer\_2331016\_35  
 AP014696.1\_2327560\_2331536\_27\_spacer\_2331081\_34  
 AP014696.1\_2327560\_2331536\_28\_spacer\_2331145\_34  
 AP014696.1\_2327560\_2331536\_29\_spacer\_2331209\_36  
 AP014696.1\_2327560\_2331536\_30\_spacer\_2331275\_35  
 AP014696.1\_2337096\_2337798\_1\_spacer\_2337126\_34

| ProtospacerType | ProtospacerContig | Protospacer | Protospacer | CRISPR Typ  | CRISPR Organism                           |
|-----------------|-------------------|-------------|-------------|-------------|-------------------------------------------|
| Phage           | JXMY01000028      | 127547      | 127583      | CAS-I-B     | Clostridium_botulinum_111_GCA_000829015.1 |
| Phage           | LFQ01000066       | 1413        | 1448        | CAS-I-B     | Clostridium_botulinum_111_GCA_000829015.1 |
| Phage           | LAGN01000021      | 36058       | 36091       | CAS-I-B     | Clostridium_botulinum_111_GCA_000829015.1 |
| Phage           | JH470460          | 5937        | 5972        | CAS-I-B     | Clostridium_botulinum_111_GCA_000829015.1 |
| ORF             | LAGK01000703      | 1765        | 1800        | CAS-I-B     | Clostridium_botulinum_111_GCA_000829015.1 |
| Phage           | JH470460          | 37236       | 37270       | CAS-I-B     | Clostridium_botulinum_111_GCA_000829015.1 |
| Phage           | LFPO01000007      | 34138       | 34171       | CAS-I-B     | Clostridium_botulinum_111_GCA_000829015.1 |
| ORF             | JSCF01000042      | 1388        | 1421        | CAS-III-B   | Clostridium_botulinum_111_GCA_000829015.1 |
| Phage           | LFOQ01000040      | 28176       | 28210       | CAS-III-B   | Clostridium_botulinum_111_GCA_000829015.1 |
| Phage           | LFQ01000043       | 18707       | 18740       | CAS-III-B   | Clostridium_botulinum_111_GCA_000829015.1 |
| Phage           | JXSU01000008      | 103302      | 103335      | CAS-III-B   | Clostridium_botulinum_111_GCA_000829015.1 |
| Phage           | LAGH01000324      | 4021        | 4056        | CAS-III-B   | Clostridium_botulinum_111_GCA_000829015.1 |
| ORF             | LFQD01000008      | 47485       | 47519       | CAS-III-B   | Clostridium_botulinum_111_GCA_000829015.1 |
| Phage           | JXSU01000007      | 2875029     | 2875062     | Unidentifie | Clostridium_botulinum_111_GCA_000829015.1 |

| Protospacer Organism                      | Target annotat                                       | Note                                    |
|-------------------------------------------|------------------------------------------------------|-----------------------------------------|
| Clostridium_botulinum_111_GCA_000829015.1 | Clostridium botulinum tail protein                   | prophage region                         |
| Clostridium_botulinum_111_GCA_000829015.1 | Clostridium botulinum unknown                        | prophage region                         |
| Clostridium_botulinum_111_GCA_000829015.1 | Clostridium botulinum unknown                        | prophage region                         |
| Clostridium_botulinum_111_GCA_000829015.1 | Clostridium sporogenesTraG/TraD fam                  | prophage region and plasmid replication |
| Clostridium_botulinum_111_GCA_000829015.1 | Clostridium botulinum unknown                        |                                         |
| Clostridium_botulinum_111_GCA_000829015.1 | Clostridium sporogenesunknown                        | prophage region                         |
| Clostridium_botulinum_111_GCA_000829015.1 | Clostridium botulinum unknown                        | prophage region                         |
| Clostridium_botulinum_111_GCA_000829015.1 | Clostridium botulinum unknown                        | prophage region                         |
| Clostridium_botulinum_111_GCA_000829015.1 | Clostridium botulinum unknown                        | prophage region                         |
| Clostridium_botulinum_111_GCA_000829015.1 | Clostridium sporogenesunknown                        | prophage region                         |
| Clostridium_botulinum_111_GCA_000829015.1 | Clostridium botulinum unknown                        |                                         |
| Clostridium_botulinum_111_GCA_000829015.1 | Clostridium botulinum nucleotide pyroprophage region |                                         |
