# Supplementary material
Source: PubMed Central journal article supplement (PMC5605939)
Supplement: mbo004173485s4.pdf [file mbo004173485s4.pdf]

|                                                                     |                                                         |          |     |
|---------------------------------------------------------------------|---------------------------------------------------------|----------|-----|
| gi 393068133 gb AKOR01000006.1 :34315-34513                         | gi 446797338 ref WP_000874594.1                         |          |     |
| gi 446797338 ref WP_000874594.1  2399                               | 258 323                                                 | 3.26e-31 |     |
| QTSFNQGTYNFSNSATLSFNNSNFNQGTYHFNSAQSTFENSNFNQGTYNFNDNTSFNNDTFNQGAY  |                                                         |          |     |
| QTSFNQGTYNFSNSATLSFNNSNFNQGTYHFNSAQSTFENSNFNQGTYNFNDNTSFNNDTFNQGTY  | 1                                                       | 198      | 307 |
| Helicobacter pylori                                                 | toxin-like outer membrane protein [Helicobacter pylori] |          |     |
| gi 393068133 gb AKOR01000006.1 :34315-34513                         | gi 446797381 ref WP_000874637.1                         |          |     |
| gi 446797381 ref WP_000874637.1  2529                               | 258 323                                                 | 1.63e-30 |     |
| QTSFNQGTYNFSNSATLSFNNSNFNQGTYHFNSAQSTFENSNFNQGTYNFNDNTSFNNDTFNQGAY  |                                                         |          |     |
| QTSFNQGTYNFSNSATLSFNNSNFNQGTYHFNSTQSTFENSNFNQGTYNFNDNTSFNNDTFNQGTY  | 1                                                       | 198      | 302 |
| Helicobacter pylori                                                 | toxin outer membrane protein [Helicobacter pylori]      |          |     |
| gi 393068133 gb AKOR01000006.1 :34315-34513                         | gi 446797342 ref WP_000874598.1                         |          |     |
| gi 446797342 ref WP_000874598.1  2399                               | 258 323                                                 | 2.63e-30 |     |
| QTSFNQGTYNFSNSATLSFNNSNFNQGTYHFNSAQSTFENSNFNQGTYNFNDNTSFNNDTFNQGAY  |                                                         |          |     |
| QTSFNQGTYDFNSNSATLSFNNSNFNQGTYHFNSAQSTFENSNFNQGAYNFNDNTSFNNDTFNQGTY | 1                                                       | 198      | 301 |
| Helicobacter pylori                                                 | toxin outer membrane protein [Helicobacter pylori]      |          |     |
| gi 393068133 gb AKOR01000006.1 :34315-34513                         | gi 1159760846 ref WP_079307344.1                        |          |     |
| gi 1159760846 ref WP_079307344.1                                    | 2397 259 324                                            | 3.32e-30 |     |
| QTSFNQGTYNFSNSATLSFNNSNFNQGTYHFNSAQSTFENSNFNQGTYNFNDNTSFNNDTFNQGAY  |                                                         |          |     |
| QTSFNQGTYNFSNSATLSFGNSNFNQGTYHFNSAQSTFENSNFNQGTYNFNDNVSFNNDTFNQGTY  | 1                                                       | 198      | 300 |
| Helicobacter pylori                                                 | toxin [Helicobacter pylori]                             |          |     |





```

gi|451810799|gb|ANAE01000140.1|:57689-58634      gi|485835026|ref|WP_001446733.1|
gi|485835026|ref|WP_001446733.1|;gi|218706248|ref|YP_002413767.1| 172      2      167      1.36e-11
RCSAGARAGP--SPRARGSRHPHGHLHLHRSIPACAGLTHILALVGTSPVHPRVRGAHAHLGVGGDFATGSPRARGSP-----
TSWRWWGLRHRSSIPACAGLT--HILALVGTSPVHPRVRGAHPHLGVGGDFATGSPRARGSPTSWRWWGLRHRSSIPACAGLTHILA
KWSSTATVGPGLSPLARGTRWWRGQTEQSRRFIPAGAGNTLTYNTENHTLTVYPRWRGEHGHSPKQTQEVNGLSPLARGTPGFHLSKCMW-----
RFIPAGAGNTTPDIFATVVT--PVYPRWRGEHRNQTQRANGVAGLSPLARGTLALFLSGESRHRFIPAGAGNTYFLS      223      714      174
Escherichia coli;Escherichia coli UMN026 hypothetical protein [Escherichia coli]
gi|451810799|gb|ANAE01000140.1|:57689-58634      gi|485835026|ref|WP_001446733.1|
gi|485835026|ref|WP_001446733.1|;gi|218706248|ref|YP_002413767.1| 172      12      167      2.32e-10
GSPRARGSRAGHRWRVAGRSIPACAGLTRALALVGTSPVHPRVRGAHPHLGVGGDFATGSPRARGSRHRTVLSGCASRSIPACAGLTSSTWPPP
TPTPVHPRVRGAHPHLGVGGDFATGSPRARGSRRTSWRWWGLRHRSSIPACAGLTHILA
GLSPLARGTRWWRGQTEQSRRFIPAGAGNTLTYNTENHTLTVYPRWRGEHGHSPKQTQEVNGLSPLARGTPGFHLSKCMWRFIPAGAGNTTPDIFAT
VVTVPYPRWRGEHRNQTQRANGVAGLSPLARGTLALFLSGESRHRFIPAGAGNTYFLS      3      470      165      Escherichia
coli;Escherichia coli UMN026 hypothetical protein [Escherichia coli]
gi|451810799|gb|ANAE01000140.1|:57689-58634      gi|485835026|ref|WP_001446733.1|
gi|485835026|ref|WP_001446733.1|;gi|218706248|ref|YP_002413767.1| 172      12      167      1.15e-09
GSPRARGSPTSWRWW---GLRHRSSIPACAGLTHILALVGTSPVHPRVRGAHPHLGVGGDFATGSPRARGSP-----
TSWRWWGLRHRSSIPACAGLT--HILALVGTSPVHPRVRGAHPHLGVGGDFATGSPRARGSPTSWRWWGLRHRSSIPACAGLTHILA      GLSPLARGT----
RWWRGQTEQSRRFIPAGAGNTLTYNTENHTLTVYPRWRGEHGHSPKQTQEVNGLSPLARGTPGFHLSKCMW-----RFIPAGAGNTTPDIFATVVT--
PVYPRWRGEHRNQTQRANGVAGLSPLARGTLALFLSGESRHRFIPAGAGNTYFLS      430      897      160      Escherichia
coli;Escherichia coli UMN026 hypothetical protein [Escherichia coli]
gi|451810799|gb|ANAE01000140.1|:57689-58634      gi|485835026|ref|WP_001446733.1|
gi|485835026|ref|WP_001446733.1|;gi|218706248|ref|YP_002413767.1| 172      12      167      1.82e-08
GSPRARGSLVPWRWW---GLRHRSSIPACAGLTHILALVGTSPVHPRVRGAHVIGRCSAGARAGSPRARGSRHPHGHLHLHRSIPACAGLT--
HILALVGTSPVHPRVRGAHAHLGVGGDFATGSPRARGSPTSWRWWGLRHRSSIPACAGLTHILA      GLSPLARGT----
RWWRGQTEQSRRFIPAGAGNTLTYNTENHTLTVYPRWRGEHGHSPKQTQEVNGLSPLARGTPGFHLSKCMWRFIPAGAGNTTPDIFATVVT--
PVYPRWRGEHRNQTQRANGVAGLSPLARGTLALFLSGESRHRFIPAGAGNTYFLS      64      531      151      Escherichia
coli;Escherichia coli UMN026 hypothetical protein [Escherichia coli]
gi|451810799|gb|ANAE01000140.1|:57689-58634      gi|485835026|ref|WP_001446733.1|
gi|485835026|ref|WP_001446733.1|;gi|218706248|ref|YP_002413767.1| 172      12      163      3.34e-08
GSPRARGSPTSWRWW---GLRHRSSIPACAGLTHILALVGTSPVHPRVRGAHPHLGVGGDFATGSPRARGSP-----
TSWRWWGLRHRSSIPACAGLT--HILALVGTSPVHPRVRGAHPHLGVGGDFATGSPRARGSPTSWRWWGLRHRSSIPACAGLT      GLSPLARGT----
RWWRGQTEQSRRFIPAGAGNTLTYNTENHTLTVYPRWRGEHGHSPKQTQEVNGLSPLARGTPGFHLSKCMW-----RFIPAGAGNTTPDIFATVVT--
PVYPRWRGEHRNQTQRANGVAGLSPLARGTLALFLSGESRHRFIPAGAGNT      491      946      149      Escherichia
coli;Escherichia coli UMN026 hypothetical protein [Escherichia coli]
gi|451810799|gb|ANAE01000140.1|:57689-58634      gi|485668974|ref|WP_001310069.1|
gi|485668974|ref|WP_001310069.1|;gi|218706249|ref|YP_002413768.1| 126      12      122      6.39e-06
GSPRARGSRAGHRWRVAGRSIPACAGLTRALALVGTSPVHPRVRGAHPHLGVGGDFATGSPRARGSRHRTVLSGCASRSIPACAGLTSSTWPPP
TPTPVHPRVRGAH
GLSPLARGTRIFYRRMSRGNRFIPAGAGNTSAAPANVSAVTYPRWRGEHPRPSIISCASFLSPLARGTHQEADESARHARFIPAGAGNTQFHMSRR
AGSSVYPRWRGEH      3      335      130      Escherichia coli;Escherichia coli UMN026 hypothetical protein
[Escherichia coli]
# BLAST processed 1 queries

```

## Predicted CRISPR-Array: 4

ContigID: KQ087587.1 (Enterobacter\_aerogenes\_UCI97\_GCA\_001030185.1)

Start: 84822

Stop: 86069

<https://www.ncbi.nlm.nih.gov/projects/sviewer/?id=KQ087587.1&v=84822..86069>

PilerCR predicted Array

>gi|844486473|gb|KQ087587.1|:84822-86069 Enterobacter aerogenes strain UCI97 genomic scaffold aeuqd-supercont1.1, whole genome shotgun sequence

```
GCGCCTTATCCGGGCTACGGTTCGGTATTTGGTTGGTAGCCCCGGTAAGCGTAAGCGCCACCGGGGAGG
ATTCCCGGATAGCGGCGGTAGCGCCTTATCCGGGCTACGGTTCGGTATGCGGTTGGTAGCCCCGGTAAG
CGTAAGCGCCACCGGGGAGGGTCCCGGATGGCGGCGCATAGCGCCTTATCCGGGCTACGGTTCGGTAG
TCGGTTGGTAGCCCCGGTAAGCGTAAGCGCCACCGGGGAGGGTTCCTCGGATGGCGGCGCATGGCGCCTTA
TCCGGGCTACGGTTCGGTATTCGGTTCGGTAGCCCCGGTAAGCGTAAGCGCCACCGGGGAGGATTCCTCGGA
TAGCGGCGCATCGCGCCTTATCCGGGCTACGATTTCGGTATTCGGTTGGTAGCTCCGGTAAGCGTAAGCGC
CACCGGGGAGGGTTCCTCGGATGGCGGCGCNNNNNNNNNNNNNNNNNNNNNNNNNNNNNNNNNNNNNNNNNN
NNNNNNNNNNNNNNNNNNNNNNNNNNNNNNNNNNNNNNNNNNNNNNNNNNNNNNNTAAACTGCGC
GCGTGGGTCGCCAGCTTCGGCCTGCTGTTGGTATTGGCTGCCCGGATCCGCAGCGTCTGCGGCGAAGCTT
GTCAGCGCCAGCAGTAAATAGAGGTATTTCAATTTTTTATTATCAATAAGGGAGACCCCGCAGTATAAA
GGCGGGCGGAAAAGAAGAAAATGGCGGGAATTAGCGGGTGAATACCCGGATAGCGGCGCATAGCGCCTT
ATCCGGGCTACGGTTCGGTATTTGGTTGGTAGCCCCGGTAAGCGTAAGCGCCACCGGGGAGGATTCCTCG
GATAGCGGCGCGTACGCGCCTTATCCGGGCTACGGTTCGGTATTCGGTTGGTAGCCCCGGTAAGCGTAAGC
GCCACCGGGGAGGGTTCCTCGGATGGCGGCGCATAGCGCCTTATCCGGGCTACGGTTCGGTAGTCGGTTG
GTAGCCCCGGTAAGCGTAAGCGCCACCGGGGAGGGTTCCTCGGATGGCGGCGCATGCGCCTTATCCGGG
TACGGTTCGGTATTCGGTTCGGTAGCCCCGGTAAGCGTAAGCGCCACCGGGGAGGATTCCTCGGATAGCGG
GCATCGCGCCTTATCCGGGCTACGATTTCGGTATTCGGTTGGTAGCTCCGGTAAGCGTAAGCGCCACCGG
GAGGGTTCCTCGGATGGCGGCGCATAGCGCCTTATCCGGGCTACGGTTCGGTAGTCGGT
```

Top 10 BLASTX results in RefSeq:

# Fields: query id, subject id, subject ids, subject length, s. start, s. end, evalue, query seq, subject seq, q. start, q. end, score, subject sci names, subject title  
# 99 hits found

```
gi|844486473|gb|KQ087587.1|:84822-86069 gi|1172898100|ref|WP_080967648.1|
gi|1172898100|ref|WP_080967648.1| 135 11 135 2.47e-77
RLPNRSPDKALCAAIREPSVALTLTGATNRIIPNRSPDKARCAAIRESSVALTLTGATDRIPNRSPDKAPCAAIREPSVALTLTGATNRLPNRSPD
KALCAAIREPSGGAYAYRGYPHTEP
RLPNRSPDKALCAAIREPSVALTLTGATNRIIPNRSPDKARCAAIRESSVALTLTGATDRIPNRSPDKAPCAAIREPSVALTLTGATNRLPNRSPD
KALCAAIREPSGGAYAYRGYPHTEP 1246 872 623 Enterobacter aerogenes hypothetical protein
[Klebsiella aerogenes]
gi|844486473|gb|KQ087587.1|:84822-86069 gi|1172898100|ref|WP_080967648.1|
gi|1172898100|ref|WP_080967648.1| 135 23 135 2.63e-68
AAIREPSVALTLTGATNRIIPNRSPDKARCAAIRESSVALTLTGATDRIPNRSPDKAPCAAIREPSVALTLTGATNRLPNRSPDKALCAAIREPS
GGAYAYRGYPHTEP
AAIREPSVALTLTGATNRIIPNRSPDKARCAAIRESSVALTLTGATDRIPNRSPDKAPCAAIREPSVALTLTGATNRLPNRSPDKALCAAIREPS
GGAYAYRGYPHTEP 447 109 563 Enterobacter aerogenes hypothetical protein [Klebsiella
aerogenes]
gi|844486473|gb|KQ087587.1|:84822-86069 gi|1172898100|ref|WP_080967648.1|
gi|1172898100|ref|WP_080967648.1| 135 11 135 1.27e-18
RLPELPTFYRIVARIRRDAPLSGNPPRWRLRPLPTEYRTVARIRRHAPPSGNPPRWRLRPLPTEYRTVARIRRYAPPSGNPPPVALTLTGATNR
IPNRSPDKALRAAIRESSPGGAYAYRGYPNTEP
RLPNRSPDKALCAAIREPSVALTLTGATNRIIPNRSPDKARCAAIRESSVALTLTGATDRIPNRSPDKAPCAAIRE-----
PSPVALTLTGATNRLPNRSPDKALCAAIREPSGGAYAYRGYPHTEP 413 18 225 Enterobacter aerogenes
hypothetical protein [Klebsiella aerogenes]
gi|844486473|gb|KQ087587.1|:84822-86069 gi|1172898100|ref|WP_080967648.1|
gi|1172898100|ref|WP_080967648.1| 135 11 135 1.60e-18
RLPELPTFYRIVARIRRDAPLSGNPPRWRLRPLPTEYRTVARIRRHAPPSGNPPRWRLRPLPTEYRTVARIRRYAPPSGNPPPVALTLTGATNR
IPNRSPDKALRAAIRESSPGGAYAYRGYPNTEP
RLPNRSPDKALCAAIREPSVALTLTGATNRIIPNRSPDKARCAAIRESSVALTLTGATDRIPNRSPDKAPCAAIRE-----
PSPVALTLTGATNRLPNRSPDKALCAAIREPSGGAYAYRGYPHTEP 1176 781 224 Enterobacter aerogenes
hypothetical protein [Klebsiella aerogenes]
gi|844486473|gb|KQ087587.1|:84822-86069 gi|1172898100|ref|WP_080967648.1|
gi|1172898100|ref|WP_080967648.1| 135 27 61 1.06e-13
```

|                                         |                                                                    |                                                                    |          |
|-----------------------------------------|--------------------------------------------------------------------|--------------------------------------------------------------------|----------|
| NPPPVALTLTGATNQIPNRSPDKALCAAIRVFTPL     | EPSPVALTLTGATNRIPNRSPDKARCAAIRESSPV                                | 836                                                                | 732      |
| 130                                     | Enterobacter aerogenes hypothetical protein [Klebsiella aerogenes] |                                                                    |          |
| gi 844486473 gb KQ087587.1 :84822-86069 | gi 1172898100 ref WP_080967648.1                                   |                                                                    |          |
| gi 1172898100 ref WP_080967648.1        | 135 1 30 1.06e-13                                                  |                                                                    |          |
| VALTLTGATNRIPNRSPDKALRAAIRESSP          | MALTLTGATNRLPNRSPDKALCAAIREPSP                                     | 915                                                                | 826 121  |
| 130                                     | Enterobacter aerogenes hypothetical protein [Klebsiella aerogenes] |                                                                    |          |
| gi 844486473 gb KQ087587.1 :84822-86069 | gi 1172898100 ref WP_080967648.1                                   |                                                                    |          |
| gi 1172898100 ref WP_080967648.1        | 135 1 30 2.18e-10                                                  |                                                                    |          |
| VALTLTGATNRIPNRSPDKALRAAIRESSP          | MALTLTGATNRLPNRSPDKALCAAIREPSP                                     | 152                                                                | 63 121   |
| 130                                     | Enterobacter aerogenes hypothetical protein [Klebsiella aerogenes] |                                                                    |          |
| gi 844486473 gb KQ087587.1 :84822-86069 | gi 1172898100 ref WP_080967648.1                                   |                                                                    |          |
| gi 1172898100 ref WP_080967648.1        | 135 27 50 2.18e-10                                                 |                                                                    |          |
| EPSPVALTLTGATNRIPNRSPDKA 73             | 2 101                                                              | Enterobacter aerogenes hypothetical protein                        |          |
| [Klebsiella aerogenes]                  |                                                                    |                                                                    |          |
| gi 844486473 gb KQ087587.1 :84822-86069 | gi 1172898100 ref WP_080967648.1                                   |                                                                    |          |
| gi 1172898100 ref WP_080967648.1        | 135 87 120 1.13e-05                                                |                                                                    |          |
| NPPPVALTLTGATNQIPNRSPDKALCAAIRVFTPL     | EPSPVALTLTGATNRLPNRSPDKALCAAIREPSP                                 | 836                                                                | 735      |
| 130                                     | Enterobacter aerogenes hypothetical protein [Klebsiella aerogenes] |                                                                    |          |
| gi 844486473 gb KQ087587.1 :84822-86069 | gi 1172898104 ref WP_080967652.1                                   |                                                                    |          |
| gi 1172898104 ref WP_080967652.1        | 105 1 105 9.68e-63                                                 |                                                                    |          |
| VALTLTGATNRIPNRSPDKARCAAIRESSPV         | ALTLTGATDRIPNRSPDKAPCAAIREPSP                                      | VALTLTGATNRLPNRSPDKALCAAIREPSP                                     | GGAYAYRG |
| YQPHTEP                                 |                                                                    |                                                                    |          |
| MALTLTGATNRIPNRSPDKARCAAIRESSPV         | ALTLTGATDRIPNRSPDKAPCAAIREPSP                                      | VALTLTGATNRLPNRSPDKALCAAIREPSP                                     | GGAYAYRG |
| YQPHTEP 423                             | 109 523                                                            | Enterobacter aerogenes hypothetical protein [Klebsiella aerogenes] |          |
