# Supplementary material
Source: PubMed Central journal article supplement (PMC5605939)
Supplement: mbo004173485st1.pdf [file mbo004173485st1.pdf]

# Supplementary table 1

## Number of completely assembled genomes with CRISPR arrays

| Phylum                                | Number Of Organisms | CRISPR               |                   |       |         |         |         |         |         |         |         |          |          |          |         |           |           |           |           |          |         | Unidentified |         |         |          |          |
|---------------------------------------|---------------------|----------------------|-------------------|-------|---------|---------|---------|---------|---------|---------|---------|----------|----------|----------|---------|-----------|-----------|-----------|-----------|----------|---------|--------------|---------|---------|----------|----------|
|                                       |                     | Containing Organisms | Number Of CRISPRs | CAS-I | CAS-I-A | CAS-I-B | CAS-I-C | CAS-I-D | CAS-I-E | CAS-I-F | CAS-I-U | CAS-II-A | CAS-II-B | CAS-II-C | CAS-III | CAS-III-A | CAS-III-B | CAS-III-C | CAS-III-D | CAS-IV-A | CAS-V-A |              | CAS-V-B | CAS-V-U | CAS-VI-A | CAS-VI-B |
| Acidithiobacillia                     | 5                   | 3                    | 4                 | 0     | 0       | 0       | 0       | 0       | 0       | 0       | 0       | 0        | 0        | 0        | 0       | 0         | 0         | 0         | 0         | 3        | 0       | 0            | 1       | 0       | 0        | 0        |
| Acidobacteria                         | 6                   | 1                    | 1                 | 0     | 0       | 0       | 1       | 0       | 0       | 0       | 0       | 0        | 0        | 0        | 0       | 0         | 0         | 0         | 0         | 0        | 0       | 0            | 0       | 0       | 0        | 0        |
| Actinobacteria                        | 521                 | 252                  | 331               | 4     | 2       | 5       | 25      | 0       | 105     | 0       | 35      | 5        | 0        | 20       | 1       | 64        | 2         | 0         | 7         | 11       | 0       | 0            | 1       | 0       | 0        | 44       |
| Alphaproteobacteria                   | 389                 | 72                   | 118               | 0     | 1       | 0       | 29      | 0       | 29      | 0       | 8       | 0        | 0        | 15       | 0       | 0         | 2         | 0         | 7         | 1        | 0       | 1            | 0       | 1       | 0        | 24       |
| Aquificae                             | 16                  | 14                   | 25                | 1     | 0       | 12      | 0       | 0       | 0       | 0       | 0       | 0        | 0        | 0        | 1       | 0         | 2         | 0         | 0         | 0        | 0       | 0            | 0       | 0       | 9        |          |
| Archaeoglobi                          | 8                   | 6                    | 12                | 1     | 2       | 3       | 0       | 0       | 0       | 0       | 0       | 0        | 0        | 1        | 1       | 0         | 0         | 0         | 0         | 0        | 0       | 0            | 0       | 0       | 4        |          |
| Armatimonadetes                       | 1                   | 0                    | 0                 | 0     | 0       | 0       | 0       | 0       | 0       | 0       | 0       | 0        | 0        | 0        | 0       | 0         | 0         | 0         | 0         | 0        | 0       | 0            | 0       | 0       | 0        |          |
| Bacteria candidate phyla              | 20                  | 1                    | 1                 | 0     | 0       | 0       | 0       | 0       | 0       | 0       | 1       | 0        | 0        | 0        | 0       | 0         | 0         | 0         | 0         | 0        | 0       | 0            | 0       | 0       | 0        |          |
| Bacteroidetes/Chlorobi group          | 191                 | 88                   | 139               | 1     | 0       | 18      | 11      | 0       | 4       | 0       | 1       | 0        | 0        | 50       | 3       | 8         | 6         | 2         | 2         | 0        | 1       | 0            | 0       | 1       | 23       | 8        |
| Betaproteobacteria                    | 337                 | 69                   | 100               | 0     | 0       | 0       | 17      | 0       | 12      | 11      | 0       | 0        | 0        | 16       | 0       | 4         | 2         | 0         | 0         | 5        | 0       | 0            | 0       | 0       | 0        | 33       |
| Blastocatella                         | 1                   | 1                    | 2                 | 0     | 0       | 0       | 0       | 0       | 0       | 0       | 1       | 0        | 0        | 0        | 0       | 0         | 0         | 0         | 0         | 0        | 0       | 0            | 0       | 0       | 0        | 1        |
| Caldiserica                           | 1                   | 1                    | 1                 | 0     | 0       | 1       | 0       | 0       | 0       | 0       | 0       | 0        | 0        | 0        | 0       | 0         | 0         | 0         | 0         | 0        | 0       | 0            | 0       | 0       | 0        | 0        |
| Candidatus Korarchaeota               | 1                   | 1                    | 1                 | 0     | 1       | 0       | 0       | 0       | 0       | 0       | 0       | 0        | 0        | 0        | 0       | 0         | 0         | 0         | 0         | 0        | 0       | 0            | 0       | 0       | 0        | 0        |
| Chlamydiae                            | 107                 | 1                    | 1                 | 0     | 0       | 0       | 0       | 0       | 1       | 0       | 0       | 0        | 0        | 0        | 0       | 0         | 0         | 0         | 0         | 0        | 0       | 0            | 0       | 0       | 0        | 0        |
| Chloroflexi                           | 25                  | 14                   | 30                | 1     | 0       | 9       | 3       | 1       | 6       | 0       | 0       | 0        | 0        | 2        | 6       | 0         | 0         | 0         | 1         | 0        | 0       | 0            | 0       | 0       | 0        | 1        |
| Chrysiogenetes                        | 1                   | 1                    | 2                 | 0     | 0       | 0       | 0       | 0       | 0       | 1       | 0       | 0        | 0        | 0        | 1       | 0         | 0         | 0         | 0         | 0        | 0       | 0            | 0       | 0       | 0        | 0        |
| Cloacimonetes                         | 1                   | 1                    | 2                 | 0     | 0       | 1       | 0       | 0       | 0       | 0       | 0       | 0        | 0        | 1        | 0       | 0         | 0         | 0         | 0         | 0        | 0       | 0            | 0       | 0       | 0        | 0        |
| Crenarchaeota                         | 62                  | 59                   | 132               | 6     | 43      | 0       | 0       | 6       | 0       | 0       | 0       | 0        | 0        | 8        | 9       | 14        | 1         | 14        | 2         | 0        | 0       | 0            | 0       | 0       | 0        | 29       |
| Cyanobacteria/Melainobacteria g       | 91                  | 51                   | 138               | 2     | 2       | 18      | 1       | 28      | 3       | 0       | 3       | 0        | 0        | 8        | 0       | 23        | 0         | 13        | 1         | 0        | 0       | 13           | 0       | 0       | 0        | 23       |
| Deferribacteres                       | 4                   | 3                    | 7                 | 0     | 0       | 3       | 0       | 0       | 0       | 0       | 0       | 0        | 0        | 0        | 2       | 1         | 0         | 0         | 0         | 0        | 0       | 0            | 0       | 0       | 0        | 1        |
| Deinococcus-Thermus                   | 24                  | 16                   | 52                | 0     | 2       | 7       | 4       | 0       | 10      | 0       | 2       | 0        | 0        | 2        | 6       | 5         | 0         | 0         | 0         | 0        | 0       | 1            | 0       | 0       | 0        | 13       |
| Dictyoglomia                          | 2                   | 2                    | 5                 | 0     | 0       | 2       | 0       | 0       | 0       | 0       | 0       | 0        | 0        | 1        | 0       | 0         | 0         | 0         | 0         | 0        | 0       | 0            | 0       | 0       | 0        | 2        |
| Elusimicrobia                         | 1                   | 1                    | 1                 | 0     | 0       | 0       | 0       | 0       | 0       | 0       | 0       | 0        | 0        | 1        | 0       | 0         | 0         | 0         | 0         | 0        | 0       | 0            | 0       | 0       | 0        | 0        |
| Endomicrobia                          | 1                   | 1                    | 1                 | 0     | 0       | 0       | 0       | 0       | 0       | 0       | 0       | 0        | 0        | 1        | 0       | 0         | 0         | 0         | 0         | 0        | 0       | 0            | 0       | 0       | 0        | 0        |
| Fibrobacteres                         | 2                   | 2                    | 2                 | 0     | 0       | 0       | 0       | 0       | 0       | 0       | 0       | 0        | 0        | 2        | 0       | 0         | 0         | 0         | 0         | 0        | 0       | 0            | 0       | 0       | 0        | 0        |
| Firmicutes                            | 1038                | 445                  | 696               | 5     | 6       | 117     | 113     | 4       | 30      | 1       | 5       | 141      | 0        | 8        | 17      | 38        | 23        | 6         | 20        | 4        | 2       | 0            | 0       | 2       | 0        | 154      |
| Fusobacteria                          | 22                  | 19                   | 24                | 0     | 0       | 12      | 0       | 0       | 0       | 0       | 0       | 2        | 0        | 2        | 1       | 3         | 0         | 0         | 1         | 0        | 0       | 0            | 0       | 0       | 0        | 3        |
| Gammaproteobacteria                   | 1351                | 655                  | 913               | 61    | 0       | 1       | 69      | 3       | 284     | 177     | 4       | 0        | 8        | 11       | 0       | 7         | 12        | 0         | 1         | 5        | 3       | 0            | 0       | 0       | 0        | 267      |
| Gemmatimonadetes                      | 2                   | 0                    | 0                 | 0     | 0       | 0       | 0       | 0       | 0       | 0       | 0       | 0        | 0        | 0        | 0       | 0         | 0         | 0         | 0         | 0        | 0       | 0            | 0       | 0       | 0        | 0        |
| Halobacteria                          | 33                  | 20                   | 28                | 0     | 0       | 16      | 0       | 4       | 0       | 0       | 0       | 0        | 0        | 0        | 0       | 0         | 0         | 0         | 0         | 0        | 0       | 0            | 0       | 0       | 0        | 8        |
| Methanobacteria                       | 17                  | 14                   | 19                | 0     | 0       | 11      | 0       | 0       | 0       | 0       | 0       | 0        | 0        | 0        | 4       | 0         | 0         | 0         | 0         | 0        | 0       | 0            | 0       | 0       | 0        | 4        |
| Methanococci                          | 16                  | 13                   | 35                | 0     | 4       | 6       | 0       | 4       | 0       | 0       | 0       | 0        | 0        | 3        | 5       | 2         | 1         | 0         | 1         | 0        | 0       | 0            | 0       | 0       | 0        | 9        |
| Methanomicrobia                       | 48                  | 41                   | 90                | 1     | 1       | 28      | 5       | 3       | 10      | 0       | 4       | 0        | 0        | 0        | 1       | 4         | 6         | 11        | 7         | 0        | 0       | 0            | 0       | 0       | 0        | 9        |
| Methanopyri                           | 1                   | 1                    | 2                 | 0     | 0       | 0       | 0       | 0       | 0       | 0       | 0       | 0        | 0        | 0        | 1       | 0         | 0         | 0         | 0         | 0        | 0       | 0            | 0       | 0       | 0        | 1        |
| Nanoarchaeota                         | 2                   | 0                    | 0                 | 0     | 0       | 0       | 0       | 0       | 0       | 0       | 0       | 0        | 0        | 0        | 0       | 0         | 0         | 0         | 0         | 0        | 0       | 0            | 0       | 0       | 0        | 0        |
| Nitrospira                            | 8                   | 5                    | 9                 | 0     | 0       | 2       | 1       | 0       | 2       | 0       | 1       | 0        | 0        | 0        | 1       | 1         | 1         | 0         | 0         | 0        | 0       | 0            | 0       | 0       | 0        | 0        |
| Planctomycetes                        | 6                   | 4                    | 4                 | 0     | 0       | 1       | 2       | 0       | 0       | 0       | 0       | 0        | 0        | 0        | 0       | 0         | 0         | 1         | 0         | 0        | 0       | 0            | 0       | 0       | 0        | 0        |
| Solibacteres                          | 1                   | 0                    | 0                 | 0     | 0       | 0       | 0       | 0       | 0       | 0       | 0       | 0        | 0        | 0        | 0       | 0         | 0         | 0         | 0         | 0        | 0       | 0            | 0       | 0       | 0        | 0        |
| Spirochaetia                          | 65                  | 25                   | 27                | 0     | 0       | 8       | 6       | 1       | 1       | 1       | 0       | 2        | 0        | 3        | 0       | 2         | 1         | 0         | 0         | 0        | 0       | 0            | 0       | 0       | 0        | 2        |
| Synergistia                           | 4                   | 3                    | 4                 | 0     | 0       | 2       | 0       | 0       | 0       | 0       | 0       | 0        | 0        | 0        | 1       | 1         | 0         | 0         | 0         | 0        | 0       | 0            | 0       | 0       | 0        | 0        |
| Tenericutes                           | 141                 | 26                   | 26                | 0     | 0       | 0       | 0       | 0       | 0       | 0       | 0       | 21       | 0        | 2        | 0       | 0         | 0         | 0         | 0         | 0        | 0       | 0            | 0       | 0       | 0        | 2        |
| Thaumarchaeota                        | 11                  | 3                    | 3                 | 0     | 0       | 3       | 0       | 0       | 0       | 0       | 0       | 0        | 0        | 0        | 0       | 0         | 0         | 0         | 0         | 0        | 0       | 0            | 0       | 0       | 0        | 0        |
| Thermobaculum                         | 1                   | 1                    | 2                 | 0     | 0       | 0       | 0       | 0       | 1       | 0       | 0       | 0        | 0        | 0        | 0       | 0         | 0         | 0         | 0         | 0        | 0       | 0            | 0       | 0       | 0        | 1        |
| Thermococci                           | 23                  | 23                   | 54                | 3     | 11      | 12      | 0       | 0       | 0       | 0       | 0       | 0        | 0        | 0        | 4       | 2         | 0         | 0         | 0         | 0        | 0       | 0            | 0       | 0       | 0        | 22       |
| Thermodesulfobacteria                 | 4                   | 4                    | 7                 | 0     | 0       | 3       | 0       | 0       | 0       | 0       | 0       | 0        | 0        | 0        | 1       | 1         | 0         | 0         | 0         | 0        | 0       | 0            | 0       | 0       | 0        | 2        |
| Thermoplasmata                        | 8                   | 7                    | 9                 | 0     | 0       | 2       | 0       | 1       | 1       | 0       | 0       | 0        | 0        | 0        | 2       | 0         | 0         | 0         | 0         | 2        | 0       | 0            | 0       | 0       | 0        | 1        |
| Thermotogae                           | 25                  | 24                   | 60                | 0     | 1       | 20      | 0       | 0       | 0       | 0       | 0       | 0        | 0        | 0        | 12      | 6         | 2         | 0         | 0         | 0        | 0       | 0            | 0       | 0       | 0        | 19       |
| Verrucomicrobia                       | 8                   | 5                    | 6                 | 0     | 0       | 0       | 0       | 0       | 1       | 0       | 0       | 0        | 0        | 0        | 0       | 0         | 0         | 1         | 0         | 0        | 1       | 0            | 0       | 0       | 0        | 0        |
| delta/epsilon subdivisions            | 301                 | 99                   | 125               | 2     | 0       | 19      | 22      | 0       | 15      | 2       | 6       | 0        | 0        | 35       | 3       | 3         | 4         | 0         | 3         | 1        | 0       | 0            | 1       | 0       | 0        | 9        |
| environmental samples                 | 1                   | 1                    | 2                 | 0     | 0       | 0       | 1       | 0       | 0       | 0       | 0       | 0        | 0        | 1        | 0       | 0         | 0         | 0         | 0         | 0        | 0       | 0            | 0       | 0       | 0        | 0        |
| unclassified Archaea (miscellaneous)  | 3                   | 1                    | 2                 | 0     | 0       | 0       | 0       | 1       | 0       | 0       | 0       | 0        | 0        | 0        | 0       | 0         | 0         | 0         | 0         | 0        | 0       | 0            | 0       | 0       | 0        | 1        |
| unclassified Bacteria (miscellaneous) | 1                   | 1                    | 2                 | 0     | 0       | 1       | 0       | 0       | 0       | 0       | 0       | 0        | 0        | 1        | 0       | 0         | 0         | 0         | 0         | 0        | 0       | 0            | 0       | 0       | 0        | 0        |
| unclassified Euryarchaeota            | 2                   | 2                    | 3                 | 0     | 0       | 1       | 0       | 0       | 0       | 0       | 0       | 0        | 0        | 0        | 0       | 1         | 0         | 0         | 0         | 0        | 0       | 0            | 0       | 0       | 0        | 1        |
|                                       | 4961                | 2103                 | 3260              | 88    | 76      | 344     | 310     | 56      | 515     | 193     | 71      | 171      | 8        | 171      | 52      | 191       | 114       | 26        | 76        | 35       | 9       | 2            | 17      | 4       | 23       | 707      |
