# Supplementary material
Source: PubMed Central journal article supplement (PMC5605939)
Supplement: mbo004173485st2.pdf [file mbo004173485st2.pdf]

|                                       |    |     |      |     |     |     |   |     |    |   |     |    |     |     |     |     |   |     |    |   |   |   |      |
|---------------------------------------|----|-----|------|-----|-----|-----|---|-----|----|---|-----|----|-----|-----|-----|-----|---|-----|----|---|---|---|------|
| Thaumarchaeota                        | 0  | 21  | 252  | 0   | 0   | 0   | 0 | 0   | 0  | 0 | 0   | 22 | 0   | 0   | 0   | 41  | 0 | 0   | 0  | 0 | 0 | 0 | 225  |
| Thermobaculum                         | 0  | 0   | 0    | 0   | 0   | 18  | 0 | 0   | 0  | 0 | 0   | 0  | 0   | 0   | 0   | 0   | 0 | 0   | 0  | 0 | 0 | 0 | 35   |
| Thermococci                           | 59 | 416 | 495  | 0   | 0   | 0   | 0 | 0   | 0  | 0 | 0   | 0  | 153 | 117 | 0   | 0   | 0 | 0   | 0  | 0 | 0 | 0 | 1970 |
| Thermodesulfobacteria                 | 0  | 0   | 187  | 0   | 0   | 0   | 0 | 0   | 0  | 0 | 0   | 0  | 29  | 51  | 0   | 0   | 0 | 0   | 0  | 0 | 0 | 0 | 63   |
| Thermoplasmata                        | 13 | 0   | 117  | 112 | 194 | 32  | 0 | 84  | 0  | 0 | 0   | 0  | 63  | 32  | 0   | 0   | 0 | 108 | 0  | 0 | 0 | 0 | 547  |
| Thermotogae                           | 0  | 6   | 1226 | 0   | 43  | 0   | 0 | 0   | 0  | 0 | 0   | 72 | 212 | 368 | 242 | 50  | 0 | 0   | 0  | 0 | 0 | 0 | 1512 |
| unclassified                          | 0  | 0   | 0    | 0   | 0   | 171 | 0 | 0   | 0  | 0 | 0   | 0  | 0   | 0   | 0   | 0   | 0 | 0   | 0  | 0 | 0 | 0 | 87   |
| Acidobacteria                         |    |     |      |     |     |     |   |     |    |   |     |    |     |     |     |     |   |     |    |   |   |   |      |
| unclassified Archaea (miscellaneous)  | 0  | 0   | 0    | 0   | 60  | 0   | 0 | 0   | 0  | 0 | 0   | 0  | 0   | 0   | 0   | 0   | 0 | 0   | 0  | 0 | 0 | 0 | 8    |
| unclassified Bacteria (miscellaneous) | 3  | 0   | 631  | 123 | 408 | 17  | 0 | 0   | 24 | 0 | 237 | 3  | 33  | 196 | 0   | 289 | 0 | 0   | 0  | 0 | 0 | 0 | 850  |
| unclassified Euryarchaeota            | 0  | 0   | 32   | 0   | 1   | 0   | 0 | 0   | 0  | 0 | 0   | 20 | 21  | 0   | 0   | 0   | 0 | 0   | 0  | 0 | 0 | 0 | 51   |
| unclassified Proteobacteria           | 0  | 0   | 0    | 0   | 0   | 0   | 8 | 0   | 0  | 0 | 0   | 0  | 0   | 0   | 0   | 0   | 0 | 0   | 0  | 0 | 0 | 0 | 0    |
| uncultured archaeon                   | 0  | 0   | 0    | 55  | 0   | 0   | 0 | 0   | 0  | 0 | 0   | 0  | 0   | 0   | 0   | 0   | 0 | 0   | 0  | 0 | 0 | 0 | 0    |
| Verrucomicrobia                       | 0  | 0   | 0    | 201 | 0   | 63  | 0 | 119 | 0  | 0 | 67  | 0  | 0   | 123 | 0   | 15  | 0 | 0   | 23 | 0 | 0 | 0 | 80   |
| Zetaproteobacteria                    | 0  | 0   | 0    | 0   | 0   | 0   | 0 | 0   | 0  | 0 | 0   | 0  | 0   | 0   | 0   | 5   | 0 | 0   | 0  | 0 | 0 | 0 | 25   |

## Number of spacers with hits

| Phylum                                         | I   | I-A | I-B  | I-C | I-D | I-E  | I-F  | I-U | II-A | II-B | II-C | III | III-A | III-B | III-C | III-D | IV-A | V-A | V-B | VI-A | VI-B | VI-C | V-U | ?    |
|------------------------------------------------|-----|-----|------|-----|-----|------|------|-----|------|------|------|-----|-------|-------|-------|-------|------|-----|-----|------|------|------|-----|------|
| Acidithiobacillia                              | 0   | 0   | 0    | 0   | 0   | 0    | 0    | 0   | 0    | 0    | 0    | 0   | 0     | 0     | 0     | 2     | 0    | 0   | 0   | 0    | 0    | 0    | 0   | 0    |
| Acidobacteria                                  | 0   | 0   | 0    | 0   | 0   | 0    | 0    | 0   | 0    | 0    | 0    | 0   | 0     | 0     | 0     | 0     | 0    | 0   | 0   | 0    | 0    | 0    | 0   | 1    |
| Actinobacteria                                 | 56  | 6   | 120  | 429 | 0   | 1716 | 0    | 287 | 20   | 0    | 145  | 3   | 11    | 1     | 0     | 11    | 63   | 0   | 0   | 0    | 0    | 0    | 0   | 746  |
| Alphaproteobacteria                            | 0   | 1   | 0    | 45  | 0   | 34   | 0    | 0   | 0    | 0    | 10   | 0   | 0     | 1     | 0     | 2     | 0    | 0   | 0   | 0    | 0    | 0    | 0   | 27   |
| Aquificae                                      | 0   | 0   | 5    | 0   | 0   | 0    | 0    | 0   | 0    | 0    | 0    | 0   | 0     | 0     | 1     | 0     | 0    | 0   | 0   | 0    | 0    | 0    | 0   | 4    |
| Armatimonadetes                                | 0   | 0   | 0    | 0   | 0   | 0    | 0    | 0   | 0    | 0    | 0    | 0   | 0     | 0     | 0     | 0     | 0    | 0   | 0   | 0    | 0    | 0    | 0   | 1    |
| Bacteria candidate phyla                       | 0   | 0   | 0    | 0   | 0   | 0    | 0    | 0   | 0    | 0    | 0    | 0   | 0     | 0     | 0     | 0     | 0    | 0   | 0   | 0    | 0    | 0    | 0   | 1    |
| Bacteroidetes/Chlorobi group                   | 1   | 0   | 230  | 98  | 0   | 3    | 0    | 4   | 1    | 0    | 319  | 4   | 8     | 16    | 1     | 8     | 0    | 5   | 0   | 0    | 50   | 0    | 0   | 92   |
| Betaproteobacteria                             | 2   | 9   | 0    | 157 | 1   | 72   | 116  | 0   | 0    | 0    | 221  | 2   | 2     | 5     | 2     | 0     | 0    | 0   | 0   | 0    | 0    | 0    | 0   | 319  |
| Candidatus Marinimicrobia                      | 0   | 0   | 0    | 0   | 0   | 0    | 0    | 0   | 0    | 0    | 0    | 0   | 0     | 0     | 0     | 0     | 0    | 0   | 0   | 0    | 0    | 0    | 0   | 2    |
| Chloroflexi                                    | 0   | 0   | 1    | 7   | 0   | 16   | 0    | 0   | 0    | 0    | 0    | 0   | 2     | 0     | 0     | 2     | 0    | 0   | 0   | 0    | 0    | 0    | 0   | 2    |
| Chrysiogenetes                                 | 0   | 0   | 0    | 0   | 0   | 0    | 1    | 0   | 0    | 0    | 0    | 0   | 0     | 0     | 0     | 0     | 0    | 0   | 0   | 0    | 0    | 0    | 0   | 0    |
| Cloacimonetes                                  | 0   | 0   | 0    | 0   | 0   | 0    | 0    | 0   | 0    | 0    | 0    | 0   | 0     | 0     | 0     | 0     | 0    | 0   | 0   | 0    | 0    | 0    | 0   | 1    |
| Crenarchaeota                                  | 5   | 69  | 0    | 0   | 3   | 0    | 0    | 0   | 0    | 0    | 0    | 0   | 5     | 4     | 0     | 21    | 0    | 0   | 0   | 0    | 0    | 0    | 0   | 12   |
| Cyanobacteria/Melainabacteria group            | 0   | 0   | 25   | 1   | 35  | 3    | 0    | 1   | 0    | 0    | 0    | 4   | 2     | 16    | 0     | 4     | 0    | 0   | 0   | 0    | 0    | 0    | 1   | 34   |
| Deinococcus-Thermus delta/epsilon subdivisions | 0   | 5   | 6    | 9   | 0   | 38   | 0    | 4   | 0    | 0    | 0    | 0   | 0     | 1     | 0     | 0     | 1    | 0   | 0   | 0    | 0    | 0    | 0   | 21   |
| Elusimicrobia                                  | 7   | 0   | 52   | 28  | 0   | 16   | 7    | 2   | 0    | 2    | 178  | 0   | 5     | 1     | 0     | 8     | 2    | 0   | 0   | 0    | 0    | 0    | 0   | 70   |
| environmental samples                          | 0   | 0   | 0    | 0   | 0   | 0    | 0    | 0   | 0    | 0    | 1    | 0   | 0     | 0     | 0     | 0     | 0    | 0   | 0   | 0    | 0    | 0    | 0   | 0    |
| Fibrobacteres                                  | 0   | 0   | 0    | 0   | 0   | 0    | 0    | 0   | 0    | 0    | 1    | 0   | 0     | 0     | 0     | 0     | 0    | 0   | 0   | 0    | 0    | 0    | 0   | 0    |
| Firmicutes                                     | 40  | 6   | 1380 | 978 | 11  | 338  | 7    | 0   | 2608 | 0    | 115  | 35  | 94    | 136   | 33    | 34    | 13   | 0   | 7   | 8    | 0    | 0    | 2   | 1798 |
| Fusobacteriia                                  | 0   | 0   | 448  | 0   | 0   | 0    | 0    | 0   | 10   | 0    | 1    | 19  | 24    | 0     | 0     | 1     | 1    | 0   | 0   | 0    | 0    | 2    | 0   | 123  |
| Gammaproteobacteria                            | 286 | 0   | 0    | 529 | 0   | 1950 | 4736 | 12  | 0    | 7    | 46   | 0   | 13    | 45    | 0     | 15    | 65   | 0   | 0   | 0    | 0    | 0    | 0   | 2534 |
| Halobacteria                                   | 0   | 0   | 47   | 0   | 1   | 0    | 0    | 0   | 0    | 0    | 0    | 0   | 0     | 0     | 0     | 0     | 0    | 0   | 0   | 0    | 0    | 0    | 0   | 26   |
| Methanobacteria                                | 0   | 0   | 37   | 0   | 0   | 0    | 0    | 0   | 0    | 0    | 0    | 1   | 6     | 0     | 0     | 0     | 0    | 0   | 0   | 0    | 0    | 0    | 0   | 3    |
| Methanococci                                   | 0   | 1   | 5    | 0   | 0   | 0    | 0    | 0   | 0    | 0    | 0    | 0   | 0     | 0     | 0     | 0     | 0    | 0   | 0   | 0    | 0    | 0    | 0   | 0    |
| Methanomicrobia                                | 9   | 0   | 36   | 14  | 9   | 8    | 0    | 1   | 0    | 0    | 0    | 3   | 2     | 31    | 4     | 14    | 0    | 0   | 0   | 0    | 0    | 0    | 0   | 10   |
| nitrifying bacterium enrichment culture        | 0   | 0   | 0    | 0   | 0   | 1    | 0    | 0   | 0    | 0    | 0    | 0   | 0     | 1     | 0     | 0     | 0    | 0   | 0   | 0    | 0    | 0    | 0   | 0    |
| Nitrospira                                     | 0   | 0   | 0    | 0   | 0   | 11   | 0    | 0   | 0    | 0    | 0    | 0   | 0     | 0     | 0     | 0     | 0    | 0   | 0   | 0    | 0    | 0    | 0   | 2    |
| Planctomycetes                                 | 1   | 0   | 1    | 9   | 0   | 0    | 0    | 1   | 0    | 0    | 1    | 0   | 0     | 0     | 1     | 0     | 0    | 0   | 0   | 0    | 0    | 0    | 0   | 0    |
| Spirochaetia                                   | 106 | 3   | 268  | 40  | 0   | 263  | 0    | 0   | 15   | 0    | 16   | 0   | 0     | 0     | 0     | 0     | 0    | 0   | 0   | 0    | 0    | 0    | 0   | 462  |
| Synergistia                                    | 0   | 0   | 0    | 13  | 0   | 6    | 0    | 0   | 0    | 0    | 0    | 0   | 2     | 1     | 0     | 0     | 0    | 0   | 0   | 0    | 0    | 0    | 0   | 0    |
| Tenericutes                                    | 0   | 0   | 0    | 0   | 0   | 0    | 0    | 0   | 25   | 0    | 1    | 0   | 0     | 0     | 0     | 0     | 0    | 0   | 0   | 0    | 0    | 0    | 0   | 0    |
| Thaumarchaeota                                 | 0   | 0   | 1    | 0   | 0   | 0    | 0    | 0   | 0    | 0    | 0    | 1   | 0     | 0     | 0     | 0     | 0    | 0   | 0   | 0    | 0    | 0    | 0   | 1    |
| Thermococci                                    | 0   | 2   | 4    | 0   | 0   | 0    | 0    | 0   | 0    | 0    | 0    | 0   | 0     | 0     | 0     | 0     | 0    | 0   | 0   | 0    | 0    | 0    | 0   | 10   |
| Thermodesulfobacteria                          | 0   | 0   | 3    | 0   | 0   | 0    | 0    | 0   | 0    | 0    | 0    | 0   | 0     | 0     | 0     | 0     | 0    | 0   | 0   | 0    | 0    | 0    | 0   | 1    |
| Thermoplasmata                                 | 0   | 0   | 0    | 0   | 5   | 0    | 0    | 0   | 0    | 0    | 0    | 0   | 0     | 0     | 0     | 0     | 0    | 0   | 0   | 0    | 0    | 0    | 0   | 1    |
| Thermotogae                                    | 0   | 0   | 10   | 0   | 0   | 0    | 0    | 0   | 0    | 0    | 0    | 0   | 3     | 1     | 0     | 0     | 0    | 0   | 0   | 0    | 0    | 0    | 0   | 17   |
| unclassified Bacteria (miscellaneous)          | 0   | 0   | 3    | 1   | 0   | 0    | 0    | 0   | 0    | 0    | 2    | 0   | 0     | 0     | 0     | 0     | 0    | 0   | 0   | 0    | 0    | 0    | 0   | 0    |
| unclassified                                   | 0   | 0   | 0    | 0   | 0   | 0    | 1    | 0   | 0    | 0    | 0    | 0   | 0     | 0     | 0     | 0     | 0    | 0   | 0   | 0    | 0    | 0    | 0   | 0    |
| Proteobacteria                                 | 0   | 0   | 0    | 0   | 0   | 0    | 0    | 0   | 0    | 0    | 0    | 0   | 0     | 0     | 0     | 0     | 0    | 0   | 0   | 0    | 0    | 0    | 0   | 0    |
| Verrucomicrobia                                | 0   | 0   | 0    | 18  | 0   | 0    | 0    | 0   | 0    | 0    | 0    | 0   | 0     | 0     | 0     | 0     | 0    | 0   | 1   | 0    | 0    | 0    | 0   | 6    |
