# Supplementary material
Source: PubMed Central journal article supplement (PMC5605939)

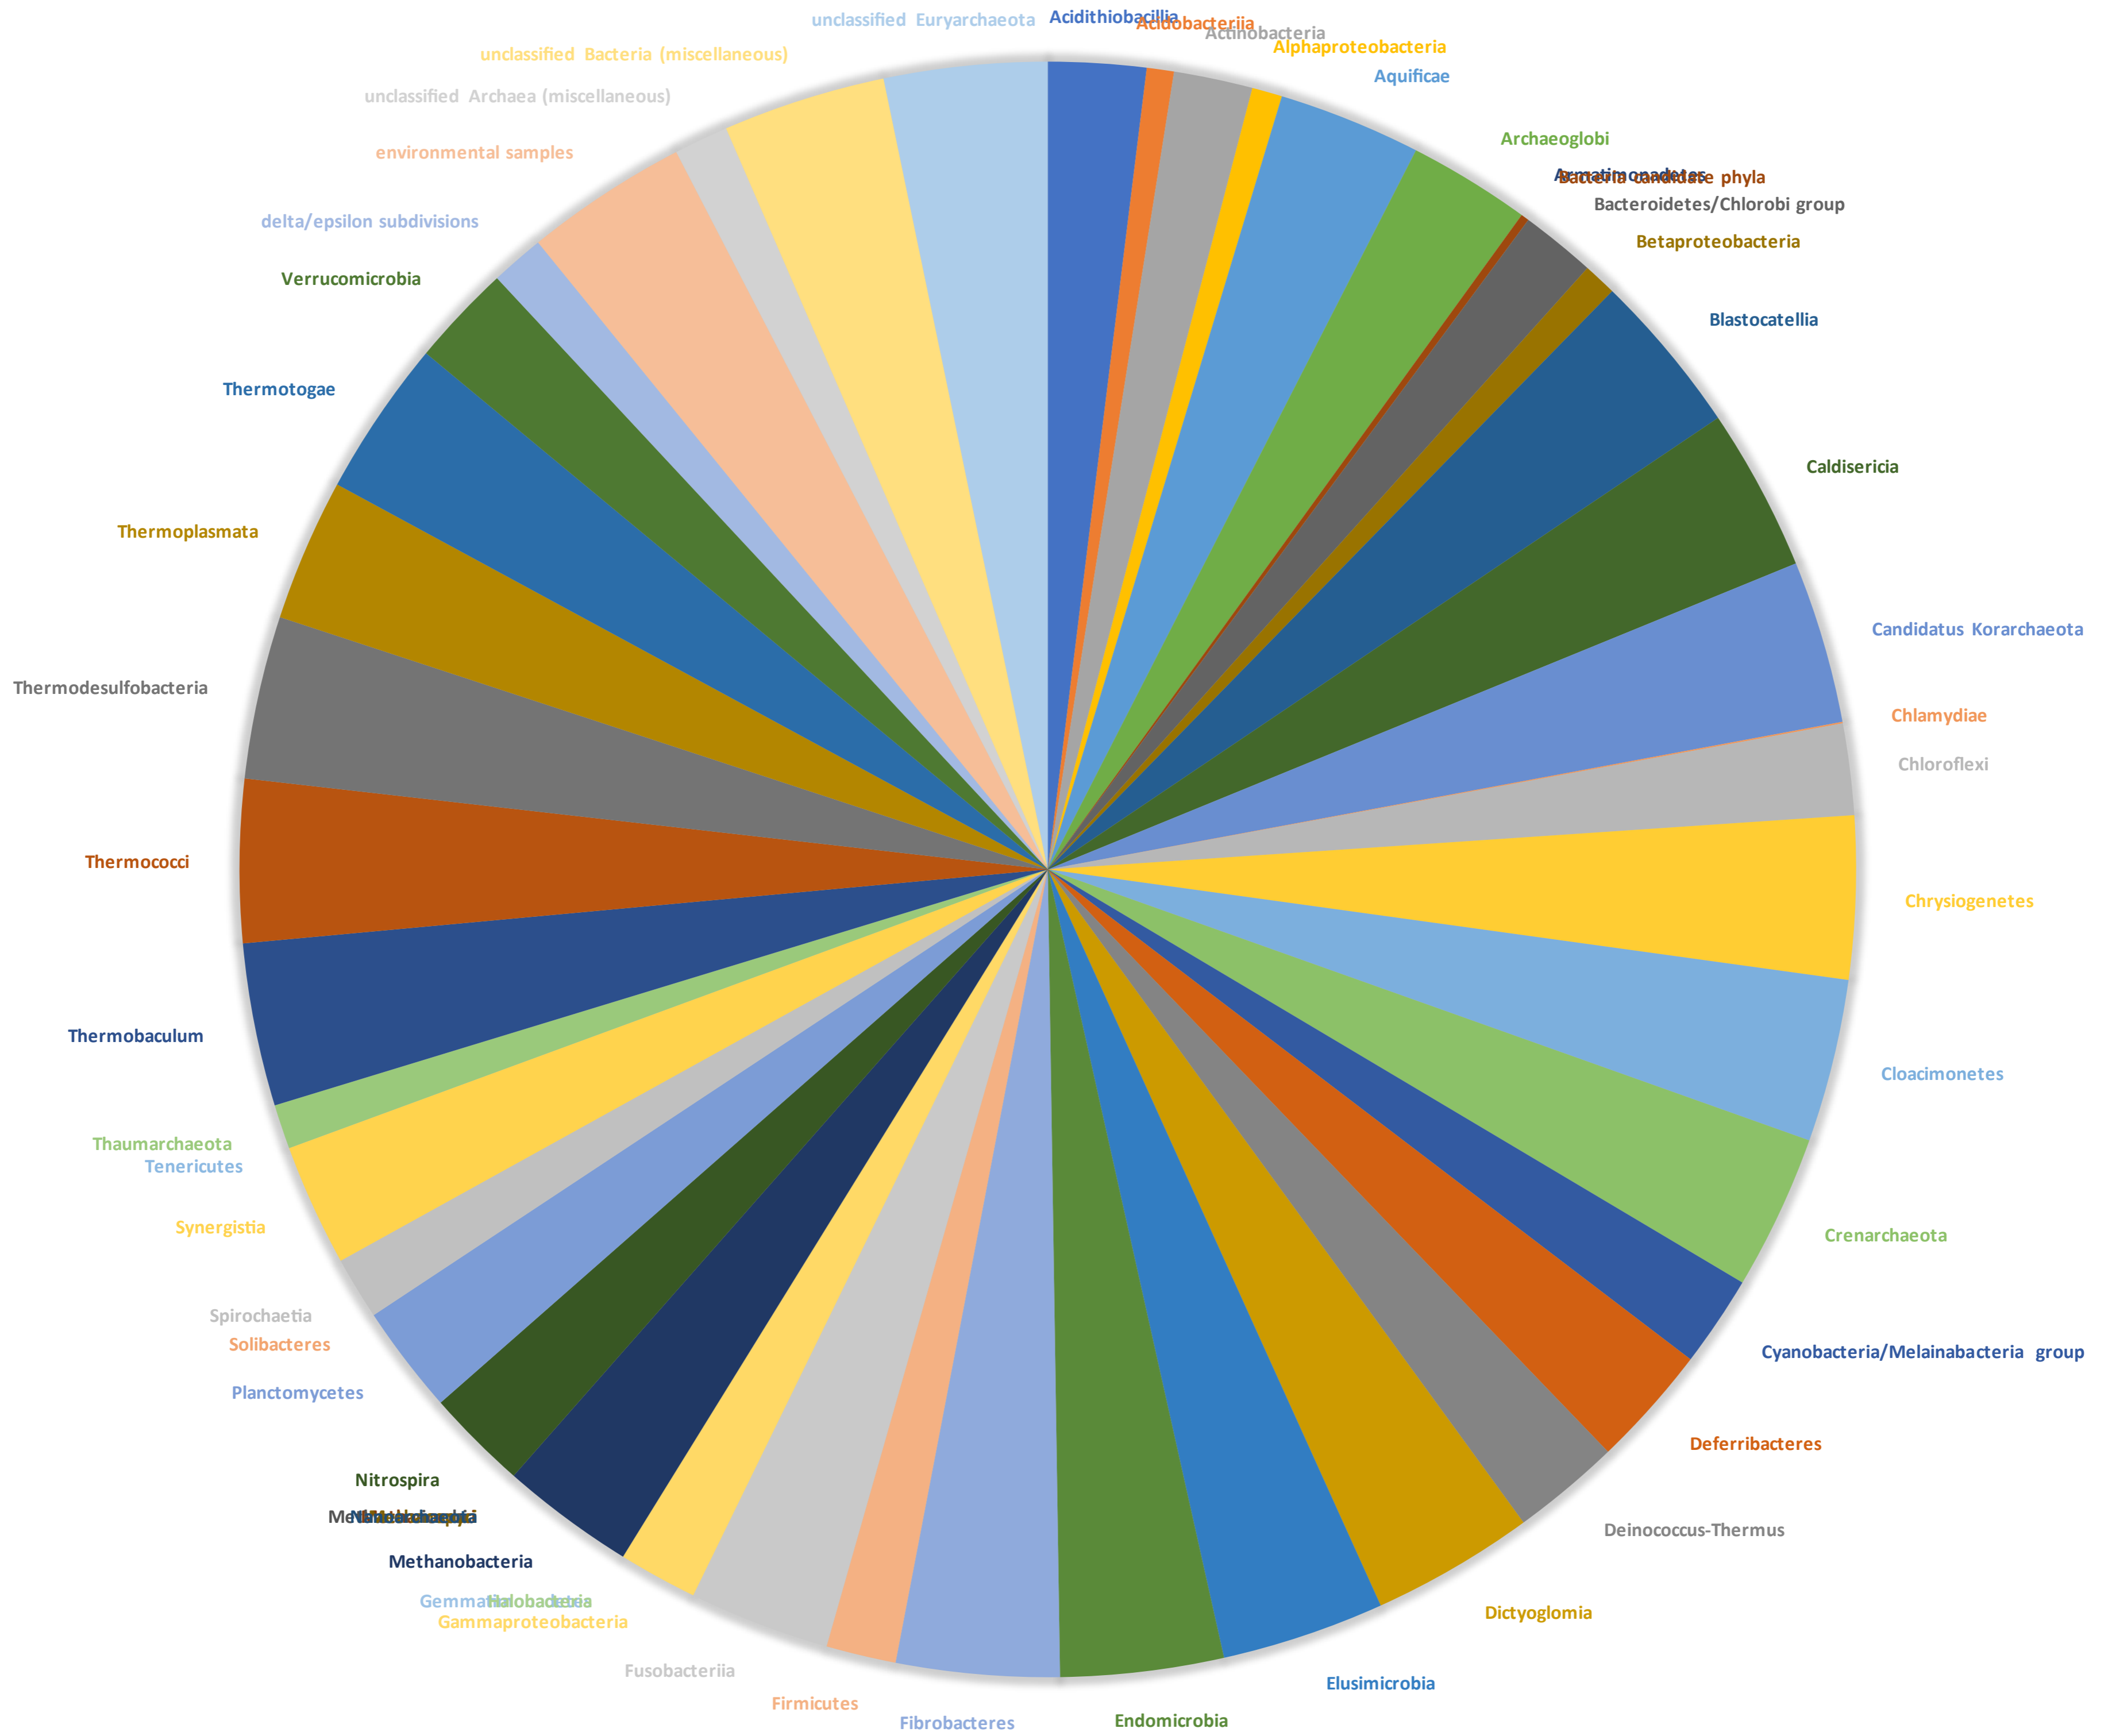

Supplementary Figure 1. DISTRIBUTION OF CRISPR ARRAYS IN COMPLETE GENOMES

Supplement: mbo004173485sf1.pdf [file mbo004173485sf1.pdf]

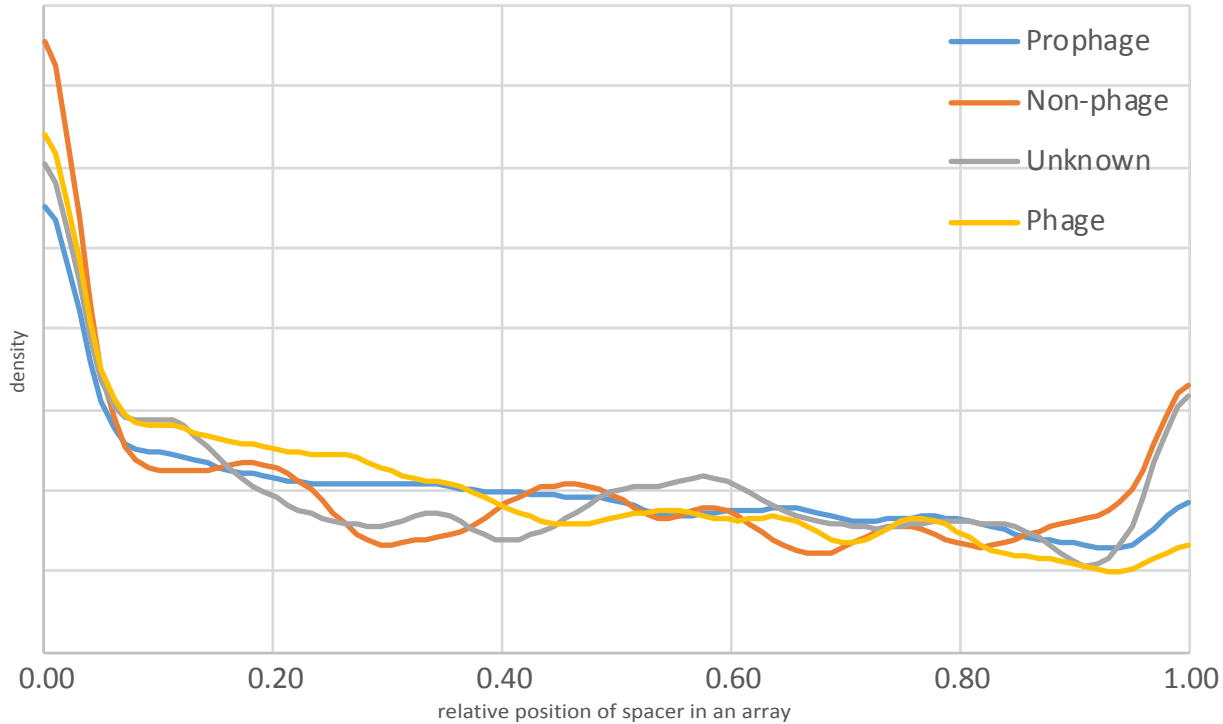

Supplementary Figure 2. Protospacer frequency for relative CRISPR array positions

Supplement: mbo004173485sf2.pdf [file mbo004173485sf2.pdf]

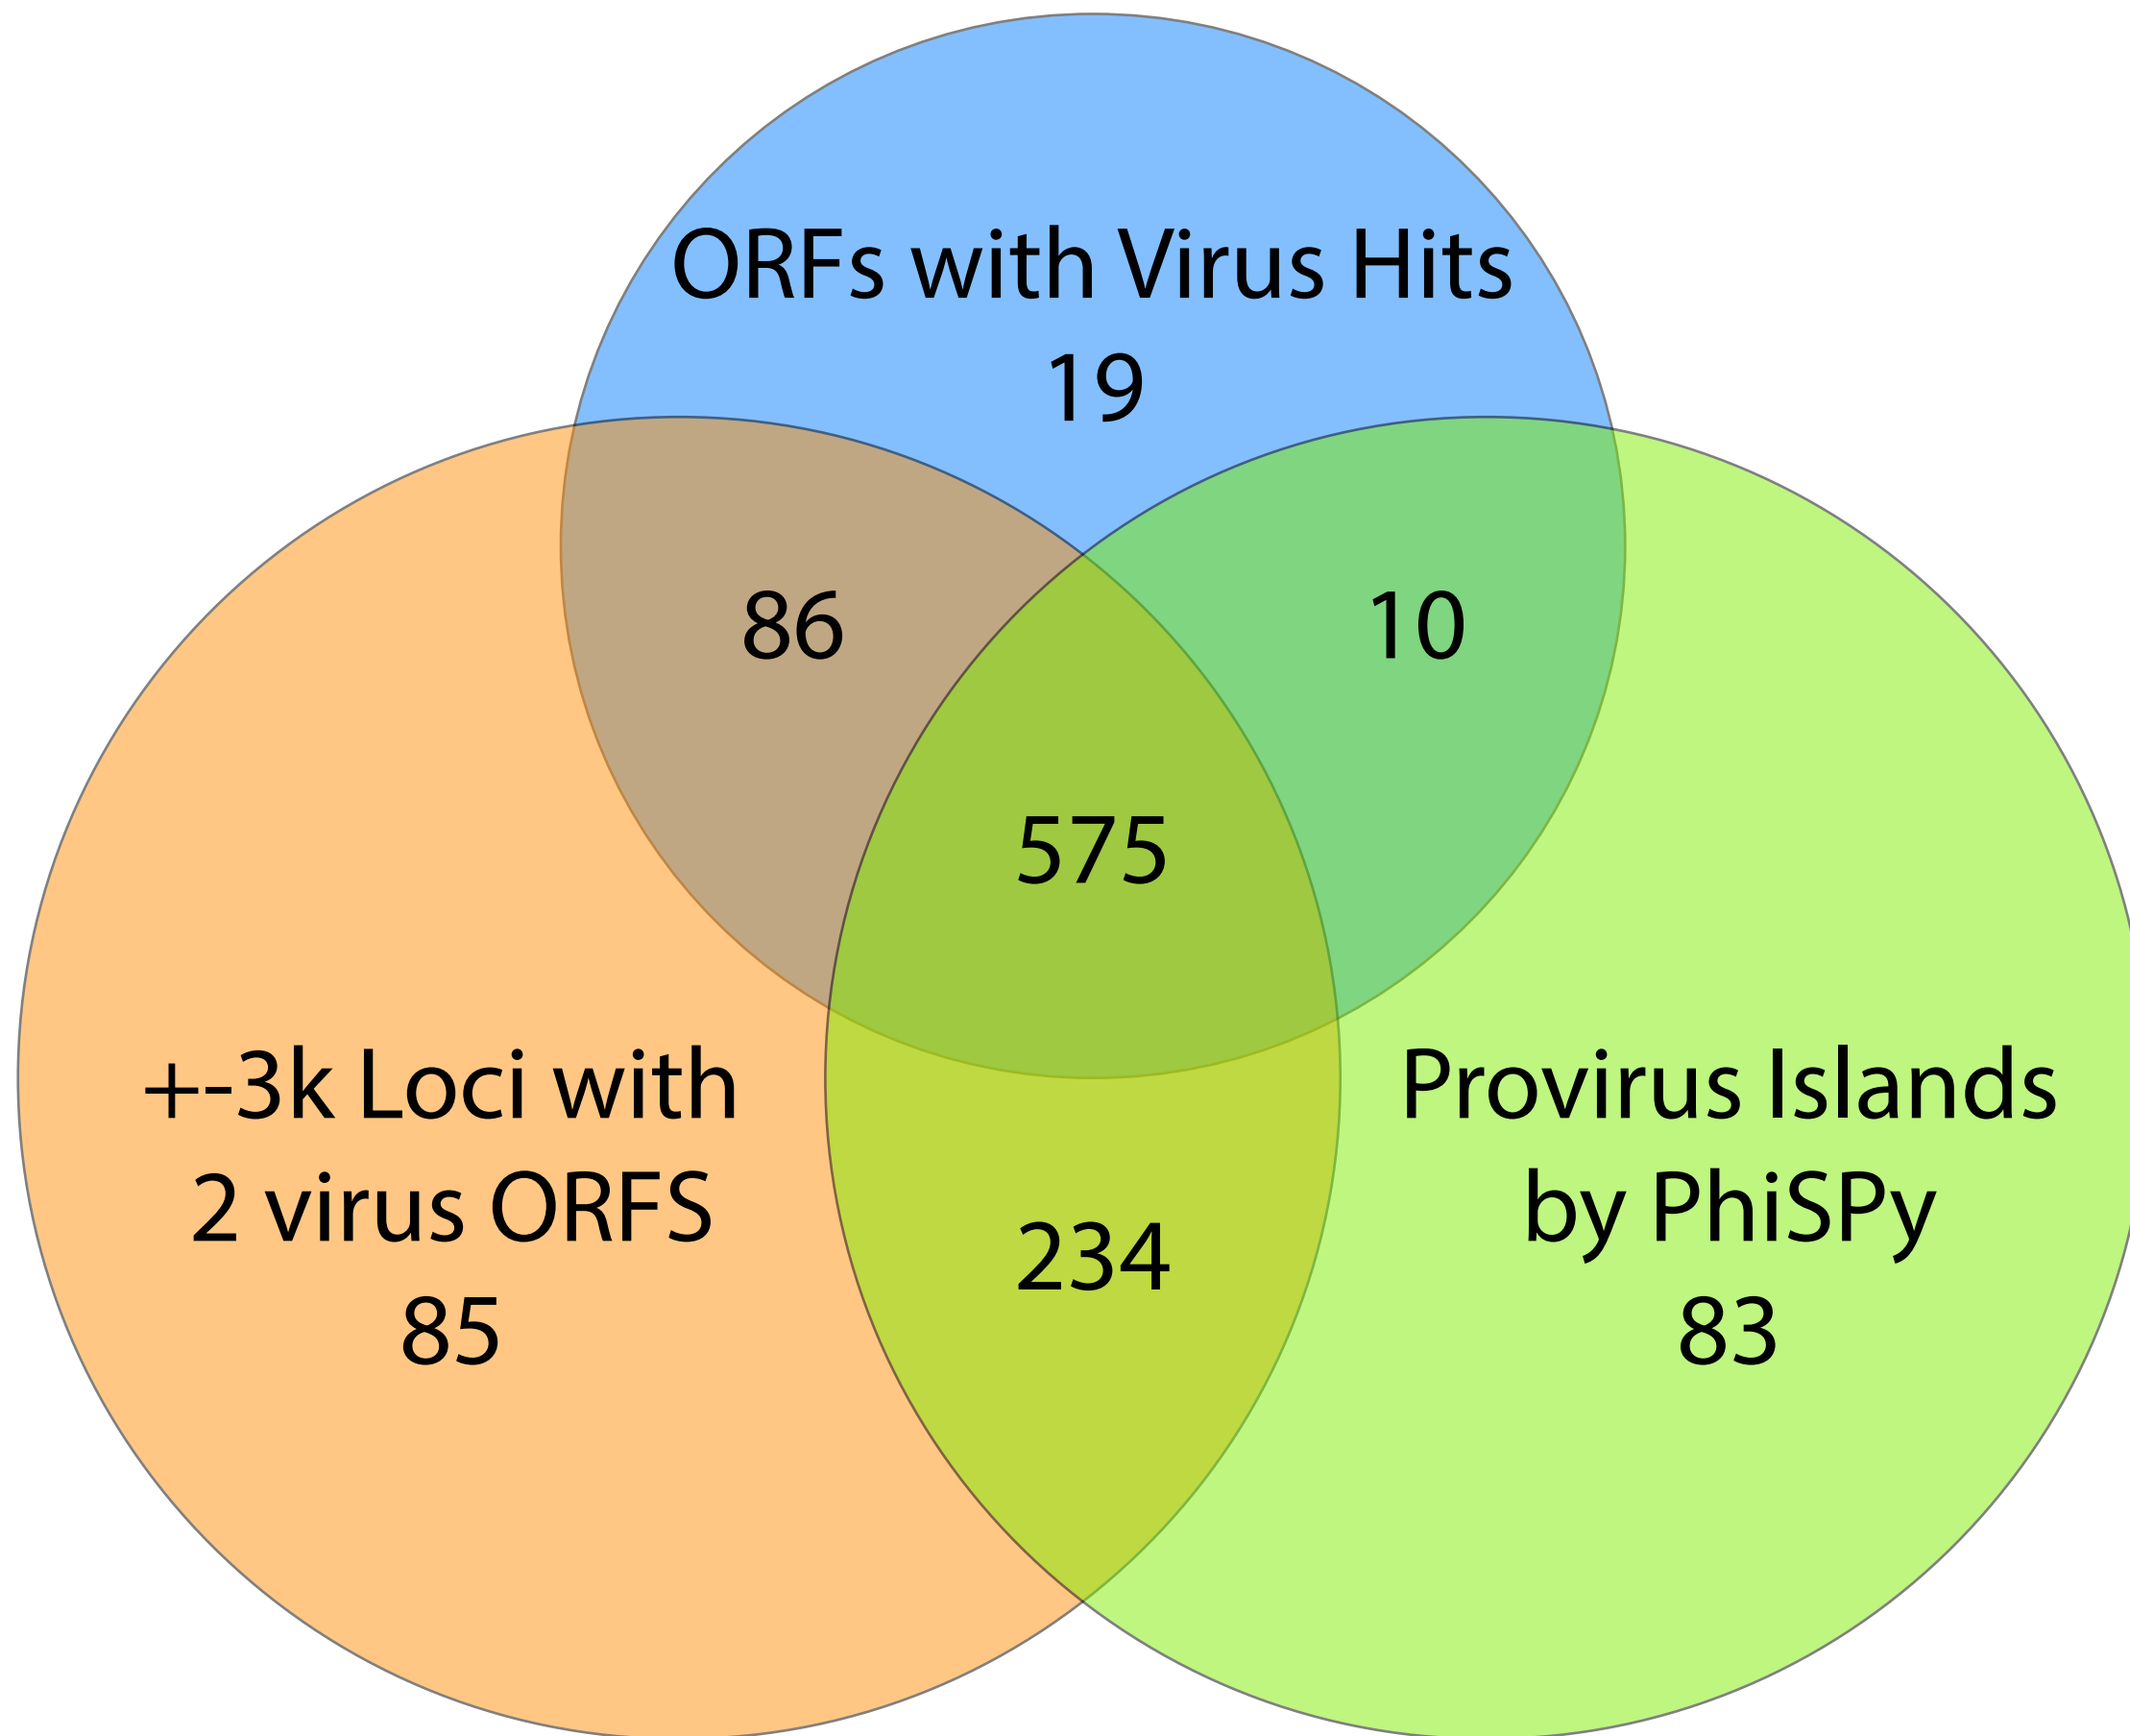

Supplementary Figure 3. Identification of prophage regions with different approaches

Supplement: mbo004173485sf3.pdf [file mbo004173485sf3.pdf]

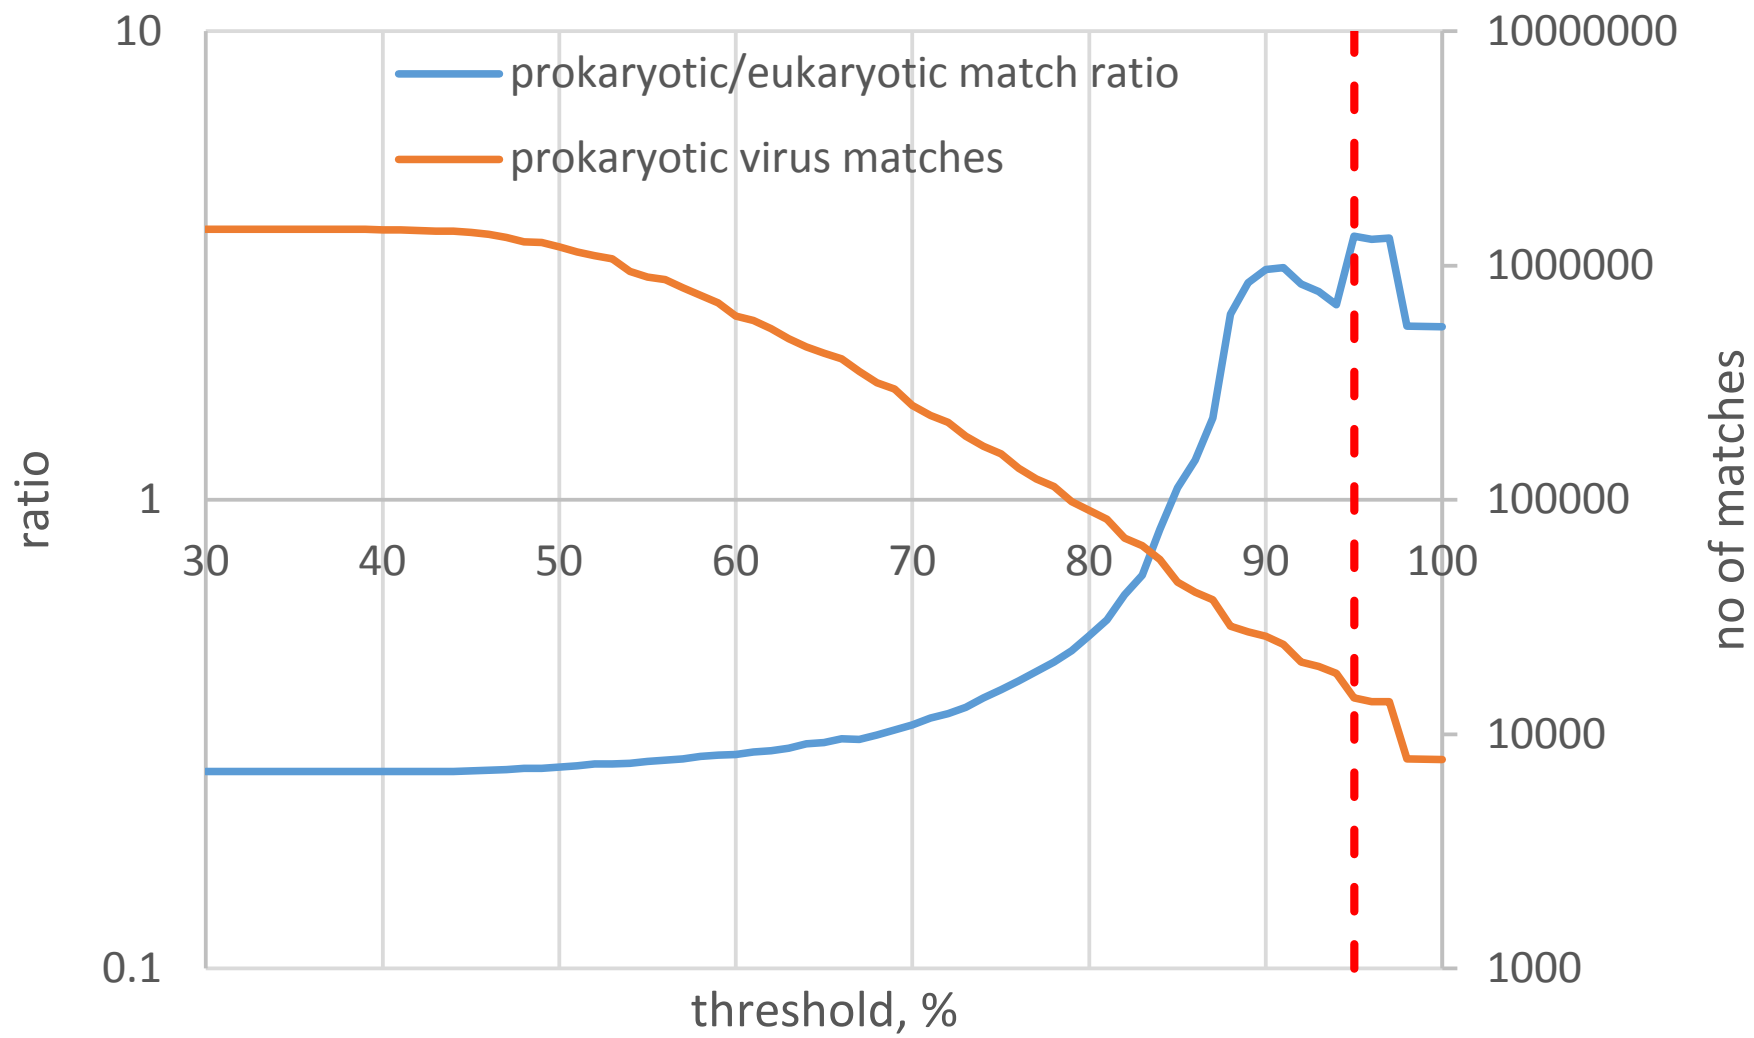

supplementary figure 4. Defining the threshold for CRISPR spacer identification

Supplement: mbo004173485sf4.pdf [file mbo004173485sf4.pdf]
